# Supplementary material for: Inventory Sharing Under Service Competition
Source: Atypon-hosted journal article supplement (doi:10.1287/msom.2020.0584), 2023-07-17
Supplement: msom.2020.0584.sm1.pdf [file msom.2020.0584.sm1.pdf]

# Online Appendix

The unabridged version of the appendix can be found on SSRN<sup>1</sup>. This online appendix is divided into six parts: In Part A, we present a horizontal differentiation model that considers utility-maximizing consumers, from which we show how the demand function in our model can be derived; Part B presents a preliminary result (Lemma A.1) which is needed for the ensuring proofs in Parts D and E; Part C shows the proof for the benchmark cases (Section 3.2); Parts D and E present the proofs for the exogenous inventory case (Section 4) and the endogenous inventory case (Section 5), respectively; Part F provides additional results that are omitted from the main paper. For easy reference, we summarize the key notations in Table A.1 below.

Table A.1: Key Notations

| Notation        | Description                                                                                            |
|-----------------|--------------------------------------------------------------------------------------------------------|
| $I_i$           | Retailer $i$ 's pre-season inventory, $i = 1, 2$                                                       |
| $s_i$           | Retailer $i$ 's service-quality level, $i = 1, 2$                                                      |
| $k$             | Cost factor for service quality                                                                        |
| $c$             | Marginal cost for pre-season inventory                                                                 |
| $\bar{c}$       | Marginal cost of quick-response order, $\bar{c} > c$                                                   |
| $p$             | Retail price of the product, $p \geq \bar{c} > c$                                                      |
| $\beta$         | Demand sensitivity factor to service, $0 < \beta \leq \bar{\beta}$                                     |
| $\delta$        | Unit shipping cost of transferring inventory from one retailer to the other, $0 \leq \delta < \bar{c}$ |
| $t$             | Unit transfer price of shared inventory between the two retailers, $0 \leq t \leq \bar{c} - \delta$    |
| $\pi_i$         | Retailer $i$ 's profit, $i = 1, 2$                                                                     |
| $\varepsilon_i$ | Random factor that influences retailer $i$ 's demand, $i = 1, 2$                                       |
| $\mu$           | Mean of $\varepsilon_i$                                                                                |
| $g_{12}$        | Joint pdf of $\varepsilon_1$ and $\varepsilon_2$                                                       |

## A. Horizontal Differentiation Model

Consider a continuum of consumers in the market with a total mass normalized to 1, who are uniformly located on a Hotelling line from 0 to 1. The two retailers are located on the two ends of the line. A consumer on location  $x \in [0, 1]$  expects to receive a utility of  $u_1(s_1, x) = v + s_1 - p - bx$  if buying from retailer 1, and a utility of  $u_2(s_2, x) = v + s_2 - p - b(1 - x)$  if buying from retailer 2, where  $v > 0$  is the consumer's valuation for the product component,  $s_i$  is the service quality of retailer  $i$ ,  $b > 0$  captures the level of horizontal differentiation between the two retailers, and  $x$  follows a uniform distribution on  $[0, 1]$  and represents the consumer's horizontal preference. Assume that  $v$  is large enough so that the market is fully covered by the two retailers in the equilibrium. A consumer on location  $x$  will visit retailer  $i$  if and only if  $u_i(s_i, x) \geq \max\{u_j(s_j, x), 0\}$ , where  $i, j = 1, 2$  and  $i \neq j$ . Each consumer's final purchase decision is subject to the influence of random interruptions. As a result, only a random fraction of consumers will eventually complete the purchase process at the visited stores, and the rest will leave the market without making a purchase. Let  $D_i = \varepsilon_i \cdot d_i(s_i, s_j)$  represent the total number of consumers who finally complete purchases from retailer  $i$ , where  $\varepsilon_i$  is the random fraction distributed on  $[0, 1]$  and  $d_i(s_i, s_j) = \frac{1}{2} + \frac{s_i - s_j}{2b}$  denotes the total number of potential consumers for retailer  $i$ , for  $i = 1, 2$ . Define  $\beta = \frac{1}{2b}$ . Then the above demand function is identical to that in our model.

<sup>1</sup>See [https://papers.ssrn.com/sol3/papers.cfm?abstract\\_id=3512712](https://papers.ssrn.com/sol3/papers.cfm?abstract_id=3512712)

## B. Preliminary Lemma

We summarize and prove a preliminary result in Lemma A.1. In the following Lemma A.1,  $Z(\cdot)$  is a general function, and  $\varepsilon_i$  is a random variable that follows a distribution with a probability density function (pdf) of  $g(\cdot)$  and a corresponding cumulative distribution function (cdf) of  $G(\cdot)$  on the interval  $[0, 1]$ , for  $i = 1, 2$ . The joint distribution of  $(\varepsilon_1, \varepsilon_2)$  has a general pdf of  $g_{12}(\cdot)$  and cdf of  $G_{12}(\cdot)$ , which satisfy that  $g_{12}(x, y) = g_{12}(y, x)$  and  $G_{12}(x, y) = G_{12}(y, x)$ .

**Lemma A.1.** *For any  $I \in [0, 1]$ , the following equations hold:*

$$\begin{aligned} (a) & \int_0^{2I} \left( \int_{2I}^{4I-\varepsilon_2} Z(\varepsilon_1, \varepsilon_2) g_{12}(\varepsilon_1, \varepsilon_2) d\varepsilon_1 \right) d\varepsilon_2 = \int_{2I}^1 \left( \int_0^{4I-\varepsilon_2} Z(\varepsilon_2, \varepsilon_1) g_{12}(\varepsilon_1, \varepsilon_2) d\varepsilon_1 \right) d\varepsilon_2; \\ (b) & \int_0^{2I} \left( \int_{4I-\varepsilon_2}^1 Z(\varepsilon_1, \varepsilon_2) g_{12}(\varepsilon_1, \varepsilon_2) d\varepsilon_1 \right) d\varepsilon_2 = \int_{2I}^1 \left( \int_{4I-\varepsilon_2}^{2I} Z(\varepsilon_2, \varepsilon_1) g_{12}(\varepsilon_1, \varepsilon_2) d\varepsilon_1 \right) d\varepsilon_2; \\ (c) & \int_0^1 (2I - \varepsilon_1) g_{12}(4I - \varepsilon_1, \varepsilon_1) d\varepsilon_1 = 0; \\ (d) & \int_0^{2I} g_{12}(4I - \varepsilon_1, \varepsilon_1) d\varepsilon_1 = \int_{2I}^1 g_{12}(4I - \varepsilon_1, \varepsilon_1) d\varepsilon_1; \\ (e) & \int_0^{2I} (2I - \varepsilon_1)^2 g_{12}(4I - \varepsilon_1, \varepsilon_1) d\varepsilon_1 = \int_{2I}^1 (2I - \varepsilon_1)^2 g_{12}(4I - \varepsilon_1, \varepsilon_1) d\varepsilon_1; \end{aligned}$$

**Proof of Lemma A.1.** (a) According to Fubini's Theorem, we have

$$\int_0^{2I} \left( \int_{2I}^{4I-\varepsilon_2} Z(\varepsilon_1, \varepsilon_2) g_{12}(\varepsilon_1, \varepsilon_2) d\varepsilon_1 \right) d\varepsilon_2 = \int_0^{2I} \left( \int_{2I}^{4I-y} Z(x, y) g_{12}(x, y) dx \right) dy = \int_{2I}^{4I} \left( \int_0^{4I-x} Z(x, y) g_{12}(x, y) dy \right) dx.$$

Let  $x = \varepsilon_2$  and  $y = \varepsilon_1$ . Since  $g_{12}(x, y) = g_{12}(y, x)$ , we have

$$\int_0^{2I} \left( \int_{2I}^{4I-\varepsilon_2} Z(\varepsilon_1, \varepsilon_2) g_{12}(\varepsilon_1, \varepsilon_2) d\varepsilon_1 \right) d\varepsilon_2 = \int_{2I}^{4I} \left( \int_0^{4I-\varepsilon_2} Z(\varepsilon_2, \varepsilon_1) g_{12}(\varepsilon_1, \varepsilon_2) d\varepsilon_1 \right) d\varepsilon_2.$$

Moreover,  $\int_{4I}^1 \left( \int_0^{4I-\varepsilon_2} Z(\varepsilon_2, \varepsilon_1) g_{12}(\varepsilon_1, \varepsilon_2) d\varepsilon_1 \right) d\varepsilon_2 = 0$  since  $g_{12}(\varepsilon_1, \varepsilon_2) = 0$  if  $(\varepsilon_1, \varepsilon_2) \notin [0, 1] \times [0, 1]$ . Thus, we have

$$\begin{aligned} \int_0^{2I} \left( \int_{2I}^{4I-\varepsilon_2} Z(\varepsilon_1, \varepsilon_2) g_{12}(\varepsilon_1, \varepsilon_2) d\varepsilon_1 \right) d\varepsilon_2 &= \int_{2I}^{4I} \left( \int_0^{4I-\varepsilon_2} Z(\varepsilon_2, \varepsilon_1) g_{12}(\varepsilon_1, \varepsilon_2) d\varepsilon_1 \right) d\varepsilon_2 + \int_{4I}^1 \left( \int_0^{4I-\varepsilon_2} Z(\varepsilon_2, \varepsilon_1) g_{12}(\varepsilon_1, \varepsilon_2) d\varepsilon_1 \right) d\varepsilon_2 \\ &= \int_{2I}^1 \left( \int_0^{4I-\varepsilon_2} Z(\varepsilon_2, \varepsilon_1) g_{12}(\varepsilon_1, \varepsilon_2) d\varepsilon_1 \right) d\varepsilon_2. \end{aligned}$$

(b) Similar to the proof of (a), according to Fubini's Theorem, we have

$$\begin{aligned} \int_0^{2I} \left( \int_{4I-\varepsilon_2}^1 Z(\varepsilon_1, \varepsilon_2) g_{12}(\varepsilon_1, \varepsilon_2) d\varepsilon_1 \right) d\varepsilon_2 &= \int_0^{2I} \left( \int_{4I-y}^1 Z(x, y) g_{12}(x, y) dx \right) dy = \int_{2I}^1 \left( \int_{4I-x}^{2I} Z(x, y) g_{12}(x, y) dy \right) dx \\ &= \int_{2I}^1 \left( \int_{4I-\varepsilon_2}^{2I} Z(\varepsilon_2, \varepsilon_1) g_{12}(\varepsilon_1, \varepsilon_2) d\varepsilon_1 \right) d\varepsilon_2. \end{aligned}$$

(c) To show Lemma A.1(c), we just need to show:

$$\int_0^{2I} (2I - \varepsilon_1) g_{12}(4I - \varepsilon_1, \varepsilon_1) d\varepsilon_1 + \int_{2I}^1 (2I - \varepsilon_1) g_{12}(4I - \varepsilon_1, \varepsilon_1) d\varepsilon_1 = 0.$$

Since  $\int_{4I}^1 (2I - \varepsilon_1) g_{12}(4I - \varepsilon_1, \varepsilon_1) d\varepsilon_1 = 0$ , we just need to show:

$$\int_0^{2I} (2I - \varepsilon_1) g_{12}(4I - \varepsilon_1, \varepsilon_1) d\varepsilon_1 + \int_{2I}^{4I} (2I - \varepsilon_1) g_{12}(4I - \varepsilon_1, \varepsilon_1) d\varepsilon_1 = 0.$$

Let  $x = 4I - \varepsilon_1$ . Then, we have

$$\begin{aligned} \int_{2I}^{4I} (2I - \varepsilon_1) g_{12}(4I - \varepsilon_1, \varepsilon_1) d\varepsilon_1 &= \int_0^{2I} (x - 2I) g_{12}(x, 4I - x) dx = \int_0^{2I} (\varepsilon_1 - 2I) g_{12}(\varepsilon_1, 4I - \varepsilon_1) d\varepsilon_1 \\ &= - \int_0^{2I} (2I - \varepsilon_1) g_{12}(4I - \varepsilon_1, \varepsilon_1) d\varepsilon_1. \end{aligned}$$

(d) Since  $\int_{4I}^1 g_{12}(4I - \varepsilon_1, \varepsilon_1) d\varepsilon_1 = 0$ , we just need to show

$$\int_0^{2I} g_{12}(4I - \varepsilon_1, \varepsilon_1) d\varepsilon_1 = \int_{2I}^{4I} g_{12}(4I - \varepsilon_1, \varepsilon_1) d\varepsilon_1.$$

Similar to the proof of (a), let  $x = 4I - \varepsilon_1$ , and we have

$$\int_0^{2I} g_{12}(4I - \varepsilon_1, \varepsilon_1) d\varepsilon_1 = - \int_{4I}^{2I} g_{12}(x, 4I - x) dx = \int_{2I}^{4I} g_{12}(4I - x, x) dx = \int_{2I}^{4I} g_{12}(4I - \varepsilon_1, \varepsilon_1) d\varepsilon_1.$$

(e) Since  $\int_{4I}^1 (2I - \varepsilon_1)^2 g_{12}(4I - \varepsilon_1, \varepsilon_1) d\varepsilon_1 = 0$ , we just need to show

$$\int_0^{2I} (2I - \varepsilon_1)^2 g_{12}(4I - \varepsilon_1, \varepsilon_1) d\varepsilon_1 = \int_{2I}^{4I} (2I - \varepsilon_1)^2 g_{12}(4I - \varepsilon_1, \varepsilon_1) d\varepsilon_1.$$

Similar to the proof of (a), let  $x = 4I - \varepsilon_1$ , and we have

$$\begin{aligned} \int_0^{2I} (2I - \varepsilon_1)^2 g_{12}(4I - \varepsilon_1, \varepsilon_1) d\varepsilon_1 &= \int_{4I}^{2I} (x - 2I)^2 g_{12}(x, 4I - x) d(4I - x) = \int_{2I}^{4I} (2I - x)^2 g_{12}(x, 4I - x) dx \\ &= \int_{2I}^{4I} (2I - \varepsilon_1)^2 g_{12}(4I - \varepsilon_1, \varepsilon_1) d\varepsilon_1 \end{aligned}$$

This completes the proof of Lemma A.1.  $\square$

## C. Benchmark Cases

**Proof of Lemma 1.** We first show the optimal inventory and profit in the centralized case, and then show the equilibrium in the decentralized case without competition. Finally, we prove parts (a)-(c) in Lemma 1.

**Centralized System.** It is clear that the centralized firm will set zero service quality for each retailer to save cost, i.e.,  $s_1^c = s_2^c = 0$ . Thus, the demand of retailer  $i$  is  $D_i = \frac{1}{2}\varepsilon_i$ . Inventory sharing between the retailers will naturally occur at a unit shipping cost  $\delta$ . Thus, a centralized firm's problem is given by

$$\begin{aligned} \max_{I_1, I_2} \pi^c(I_1, I_2) &= p \cdot E[\frac{1}{2}\varepsilon_1 + \frac{1}{2}\varepsilon_2] - \bar{c} \cdot E[(\frac{1}{2}\varepsilon_1 + \frac{1}{2}\varepsilon_2 - I_1 - I_2)^+] \\ &\quad - \delta \cdot (E[(\min\{I_1 - \frac{1}{2}\varepsilon_1, \frac{1}{2}\varepsilon_2 - I_2\})^+] + (\min\{I_2 - \frac{1}{2}\varepsilon_2, \frac{1}{2}\varepsilon_1 - I_1\})^+) - c(I_1 + I_2). \end{aligned} \quad (\text{A.1})$$

We first check the second-order condition:

$$\frac{d^2 \pi^c(I_1, I_2)}{dI_i^2} = -2\delta g(2I_i) - 2(\bar{c} - \delta) \int_0^1 g_{12}(2I_1 + 2I_2 - \varepsilon, \varepsilon) d\varepsilon \leq 0,$$

$$\frac{d^2 \pi^c(I_1, I_2)}{dI_1 dI_2} = -2(\bar{c} - \delta) \int_0^1 g_{12}(2I_1 + 2I_2 - \varepsilon, \varepsilon) d\varepsilon, \text{ and}$$

$$\frac{d^2 \pi^c(I_1, I_2)}{dI_1^2} \frac{d^2 \pi^c(I_1, I_2)}{dI_2^2} - (\frac{d^2 \pi^c(I_1, I_2)}{dI_1 dI_2})^2 = 4\delta^2 g(2I_1)g(2I_2) + 4\delta(\bar{c} - \delta)(g(2I_1) + g(2I_2)) \int_0^1 g_{12}(2I_1 + 2I_2 - \varepsilon, \varepsilon) d\varepsilon \geq 0.$$

Thus,  $\pi^c(I_1, I_2)$  is jointly concave in  $I_1$  and  $I_2$ . Therefore, the optimal inventory can be obtained by solving the first-order-condition  $\frac{d\pi^c(I_1, I_2)}{dI_1} = 0$  and  $\frac{d\pi^c(I_1, I_2)}{dI_2} = 0$ . So we can get optimal inventory level  $I_1^c = I_2^c = I^c$  that satisfies:

$$\begin{aligned} Y^c(I^c) &= \int_0^{2I^c} (\int_{4I^c - \varepsilon_2}^1 \bar{c} g_{12}(\varepsilon_1, \varepsilon_2) d\varepsilon_1 + \int_{2I^c}^{4I^c - \varepsilon_2} \delta g_{12}(\varepsilon_1, \varepsilon_2) d\varepsilon_1) d\varepsilon_2 + \\ &\quad \int_{2I^c}^1 (\int_{2I^c}^1 \bar{c} g_{12}(\varepsilon_1, \varepsilon_2) d\varepsilon_1 + \int_{4I^c - \varepsilon_2}^{2I^c} (\bar{c} - \delta) g_{12}(\varepsilon_1, \varepsilon_2) d\varepsilon_1) d\varepsilon_2 - c = 0. \end{aligned} \quad (\text{A.2})$$

The centralized firm's optimal total profit from the two retailers is given as below:

$$\pi^{c*} = 2\pi_i^{c*} = 2(p \cdot E[\frac{1}{2}\varepsilon_i] - \delta \cdot E[(\min\{\frac{1}{2}\varepsilon_i - I^c, I^c - \frac{1}{2}\varepsilon_j\})^+] - \bar{c} \cdot E[(\frac{1}{2}\varepsilon_i - I^c - (I^c - \frac{1}{2}\varepsilon_j))^+] - cI^c). \quad (\text{A.3})$$

**Decentralized System without Competition.** It is obvious that each retailer's service quality will be zero when  $\beta = 0$  since it has no impact on demand. Thus, the demand of retailer  $i$  is  $D_i = \frac{1}{2}\varepsilon_i$ . We first solve the case without inventory sharing and then the case with inventory sharing.

**Without Inventory Sharing.** Retailer  $i$ 's profit in this case is given by

$$\pi_i^{nc-N}(I_i) = p \cdot E[\frac{1}{2}\varepsilon_i] - \bar{c} \cdot E[(\frac{1}{2}\varepsilon_i - I_i)^+] - cI_i, \text{ for } i = 1, 2. \quad (\text{A.4})$$

When the inventory is an endogenous decision, retailer  $i$  chooses  $I_i$  to maximize the above profit. We can verify that  $\frac{d^2\pi_i^{nc-N}(I_i)}{dI_i^2} = -2\bar{c}g(2I_i) \leq 0$ , i.e.,  $\pi_i^{nc-N}(I_i)$  is concave in  $I_i$ . Thus, retailer  $i$ 's optimal inventory can be obtained by solving the first-order-condition  $\frac{d\pi_i^{nc-N}(I_i)}{dI_i} = \int_0^{2I_i} \bar{c}g(\varepsilon)d\varepsilon - c = 0$ . Thus, the optimal inventory level is:  $I_1^{nc-N} = I_2^{nc-N} = I^{nc-N} = G^{-1}(1 - \frac{c}{\bar{c}})/2$ ; and the retailer  $i$ 's corresponding profit is  $\pi_i^{nc-N*} = \pi_i^{nc-N}(I^{nc-N})$ .

**With Inventory Sharing.** Retailer  $i$ 's profit in this case is given by

$$\begin{aligned} \pi_i^{nc}(t, I_i|I_j) = & p \cdot E[\frac{1}{2}\varepsilon_i] + t \cdot E[(\min\{I_i - \frac{1}{2}\varepsilon_i, \frac{1}{2}\varepsilon_j - I_j\})^+] - (t + \delta) \cdot E[(\min\{\frac{1}{2}\varepsilon_i - I_i, I_j - \frac{1}{2}\varepsilon_j\})^+] \\ & - \bar{c} \cdot E[(\frac{1}{2}\varepsilon_i - I_i - (I_j - \frac{1}{2}\varepsilon_j)^+)^+] - cI_i \end{aligned} \quad (\text{A.5})$$

When the the inventory is an endogenous decision, retailer  $i$  chooses  $I_i$  to maximize the above profit. We can verify that

$$\begin{aligned} \frac{d^2\pi_i^{nc}(t, I_i|I_j)}{dI_i^2} = & -2 \int_0^{2I_j} ((t + \delta)g_{12}(2I_i, \varepsilon_j) + (\bar{c} - t - \delta)g_{12}(2I_i + 2I_j - \varepsilon_j, \varepsilon_j))d\varepsilon_j \\ & - 2 \int_{2I_j}^1 ((\bar{c} - t)g_{12}(2I_i, \varepsilon_j) + tg_{12}(2I_i + 2I_j - \varepsilon_j, \varepsilon_j))d\varepsilon_j < 0. \end{aligned}$$

That is,  $\pi_i^{nc}(t, I_i|I_j)$  is concave in  $I_i$ . Therefore, the two retailers' optimal inventory levels can be obtained by solving the first-order-condition  $\frac{d\pi_1^{nc}(t, I_1|I_2)}{dI_1} = 0$  and  $\frac{d\pi_2^{nc}(t, I_2|I_1)}{dI_2} = 0$  together. So the equilibrium inventory level  $I_1^{nc} = I_2^{nc} = I^{nc}$  satisfies:

$$\begin{aligned} Y^{nc}(I^{nc}, t) = & \int_0^{2I^{nc}} \left( \int_{4I^{nc}-\varepsilon_2}^1 \bar{c}g_{12}(\varepsilon_1, \varepsilon_2)d\varepsilon_1 + \int_{2I^{nc}}^{4I^{nc}-\varepsilon_2} (t + \delta)g_{12}(\varepsilon_1, \varepsilon_2)d\varepsilon_1 \right) d\varepsilon_2 + \\ & \int_{2I^{nc}}^1 \left( \int_{2I^{nc}}^1 \bar{c}g_{12}(\varepsilon_1, \varepsilon_2)d\varepsilon_1 + \int_{4I^{nc}-\varepsilon_2}^{2I^{nc}} tg_{12}(\varepsilon_1, \varepsilon_2)d\varepsilon_1 \right) d\varepsilon_2 - c = 0. \end{aligned} \quad (\text{A.6})$$

Retailer  $i$ 's equilibrium profit in the sharing case is then  $\pi_i^{nc*}(t) = \pi_i^{nc}(t, I^{nc}|I^{nc})$ .

Next, we prove parts (a) to (c) in Lemma 1.

(a) We first consider the case when the inventory is exogenous given, and then consider the endogenous-inventory case. In the exogenous-inventory case, we just need to show that, given  $I_1 = I_2 = I \in [0, 1]$ ,  $\pi_i^{nc}(t, I|I) > \pi_i^{nc-N}(I)$  holds for any transfer price  $t \in [0, \bar{c} - \delta]$ , where  $\pi_i^{nc-N}(\cdot)$  and  $\pi_i^{nc}(\cdot)$  are given by Equations (A.4) and (A.5). We can verify that:

$$\begin{aligned} \pi_i^{nc}(t, I|I) - \pi_i^{nc-N}(I) = & t \cdot E[(\min\{I - \frac{1}{2}\varepsilon_i, \frac{1}{2}\varepsilon_j - I\})^+] - (t + \delta) \cdot E[(\min\{\frac{1}{2}\varepsilon_i - I, I - \frac{1}{2}\varepsilon_j\})^+] \\ & - \bar{c} \cdot E[(\frac{1}{2}\varepsilon_i - I - (I - \frac{1}{2}\varepsilon_j)^+)^+] - (-\bar{c} \cdot E[(\frac{1}{2}\varepsilon_i - I)^+]) \\ = & (\bar{c} - \delta) \cdot E[(\min\{\frac{1}{2}\varepsilon_i - I, I - \frac{1}{2}\varepsilon_j\})^+] \geq 0. \\ (\text{since } E[(\min\{I - \frac{1}{2}\varepsilon_i, \frac{1}{2}\varepsilon_j - I\})^+] = & E[(\min\{\frac{1}{2}\varepsilon_i - I, I - \frac{1}{2}\varepsilon_j\})^+] \text{ and} \\ E[(\frac{1}{2}\varepsilon_i - I)^+] = & E[(\min\{\frac{1}{2}\varepsilon_i - I, I - \frac{1}{2}\varepsilon_j\})^+] + (\frac{1}{2}\varepsilon_i - I - (I - \frac{1}{2}\varepsilon_j)^+)^+] \\ = & E[(\min\{\frac{1}{2}\varepsilon_i - I, I - \frac{1}{2}\varepsilon_j\})^+] + E[(\frac{1}{2}\varepsilon_i - I - (I - \frac{1}{2}\varepsilon_j)^+)^+] \end{aligned}$$

Thus, the retailers prefer to share inventory for any  $t \in [0, \bar{c} - \delta]$  when inventory is exogenously given.

In the endogenous-inventory case, we just need to show that  $\pi_i^{nc*}(t) = \pi_i^{nc}(t, I^{nc}|I^{nc}) > \pi_i^{nc-N*} = \pi_i^{nc-N}(I^{nc-N})$  for any  $t \in [0, \bar{c} - \delta]$ . Note that in the sharing case, given  $I_j = I^{nc}$ ,  $I_i = I^{nc}$  is the unique solution that maximizes the retailer  $i$ 's profit. That is,  $\pi_i^{nc*}(t) = \max_{I_i} \pi_i^{nc}(t, I_i|I^{nc}) > \pi_i^{nc}(t, I^{nc-N}|I^{nc})$ , given  $I^{nc-N} \neq I^{nc}$ . Next, we will verify  $\pi_i^{nc}(t, I^{nc-N}|I^{nc}) > \pi_i^{nc-N*} = \pi_i^{nc-N}(I^{nc-N})$ :

$$\begin{aligned} \pi_i^{nc*}(t) - \pi_i^{nc-N*} &> \pi_i^{nc}(t, I^{nc-N}|I^{nc}) - \pi_i^{nc-N}(I^{nc-N}) \\ &= t \cdot E[(\min\{I^{nc-N} - \frac{1}{2}\varepsilon_i, \frac{1}{2}\varepsilon_j - I^{nc}\})^+] - (t + \delta) \cdot E[(\min\{\frac{1}{2}\varepsilon_i - I^{nc-N}, I^{nc} - \frac{1}{2}\varepsilon_j\})^+] \\ &\quad - \bar{c} \cdot E[(\frac{1}{2}\varepsilon_i - I^{nc-N} - (I^{nc} - \frac{1}{2}\varepsilon_j)^+)^+] - (-\bar{c} \cdot E[(\frac{1}{2}\varepsilon_i - I^{nc-N})^+]) \\ &= t \cdot E[(\min\{I^{nc-N} - \frac{1}{2}\varepsilon_i, \frac{1}{2}\varepsilon_j - I^{nc}\})^+] + (\bar{c} - t - \delta) \cdot E[(\min\{\frac{1}{2}\varepsilon_i - I^{nc-N}, I^{nc} - \frac{1}{2}\varepsilon_j\})^+] > 0. \end{aligned}$$

(since  $E[(\frac{1}{2}\varepsilon_i - I^{nc-N})^+] = E[(\min\{\frac{1}{2}\varepsilon_i - I^{nc-N}, I^{nc} - \frac{1}{2}\varepsilon_j\})^+] + (\frac{1}{2}\varepsilon_i - I^{nc-N} - (I^{nc} - \frac{1}{2}\varepsilon_j)^+)^+]$ )

$$= E[(\min\{\frac{1}{2}\varepsilon_i - I^{nc-N}, I^{nc} - \frac{1}{2}\varepsilon_j\})^+] + E[(\frac{1}{2}\varepsilon_i - I^{nc-N} - (I^{nc} - \frac{1}{2}\varepsilon_j)^+)^+] )$$

Therefore, for any  $t \in [0, \bar{c} - \delta]$ ,  $\pi_i^{nc*}(t) > \pi_i^{nc-N*}$  holds, and the retailers prefer to share inventory when inventory is an endogenous decision,

(b) Given the exogenous inventory  $I_1 = I_2 = I \in [0, 1]$ , retailer  $i$ 's profit in the sharing case can be simplified as below:

$$\begin{aligned} \pi_i^{nc}(t, I|I) &= p \cdot E[\frac{1}{2}\varepsilon_i] + t \cdot E[(\min\{I - \frac{1}{2}\varepsilon_i, \frac{1}{2}\varepsilon_j - I\})^+] - (t + \delta) \cdot E[(\min\{\frac{1}{2}\varepsilon_i - I, I - \frac{1}{2}\varepsilon_j\})^+] \\ &\quad - \bar{c} \cdot E[(\frac{1}{2}\varepsilon_i - I - (I - \frac{1}{2}\varepsilon_j)^+)^+] - cI \\ &= p \cdot E[\frac{1}{2}\varepsilon_i] - \delta \cdot E[(\min\{\frac{1}{2}\varepsilon_i - I, I - \frac{1}{2}\varepsilon_j\})^+] - \bar{c} \cdot E[(\frac{1}{2}\varepsilon_i - I - (I - \frac{1}{2}\varepsilon_j)^+)^+] - cI. \end{aligned}$$

Thus,  $\pi_i^{nc}(t, I|I)$  is independent in the transfer price  $t$ .

(c) It is obvious that the optimal inventory in the centralized case,  $I^c$ , is independent in  $t$ , since it is solved from  $Y^c(I) = 0$  (Equation (A.2)). Moreover, we can verify that  $Y^c(I)$  continuously decreases in  $I$ :

$$\frac{\partial Y^c(I)}{\partial I} = -2\delta g(2I) - 4(\bar{c} - \delta) \int_0^1 g_{12}(4I - \varepsilon, \varepsilon) d\varepsilon < 0.$$

Next, we will show that the inventory in the sharing case of decentralized system,  $I^{nc}$ , continuously increases in  $t$ .  $I^{nc}$  is solved from  $Y^{nc}(I, t) = 0$  (Equation (A.6)). Moreover, we can verify that  $Y^{nc}(I, t)$  decreases in  $I$  and increases in  $t$ :

$$\begin{aligned} \frac{\partial Y^{nc}(I, t)}{\partial I} &= - \int_{2I}^1 (2(\bar{c} - t)g_{12}(2I, \varepsilon_2) + 4tg_{12}(4I - \varepsilon_2, \varepsilon_2)) d\varepsilon_2 \\ &\quad - \int_0^{2I} (2(t + \delta)g_{12}(2I, \varepsilon_2) + 4(\bar{c} - t - \delta)g_{12}(4I - \varepsilon_2, \varepsilon_2)) d\varepsilon_2 < 0, \\ \frac{\partial Y^{nc}(I, t)}{\partial t} &= \int_0^{2I} (\int_{2I}^{4I - \varepsilon_2} g_{12}(\varepsilon_1, \varepsilon_2) d\varepsilon_1) d\varepsilon_2 + \int_{2I}^1 (\int_{4I - \varepsilon_2}^{2I} g_{12}(\varepsilon_1, \varepsilon_2) d\varepsilon_1) d\varepsilon_2 > 0. \end{aligned}$$

According to Chain Rule, we have  $\frac{\partial I^{nc}}{\partial t} = -\frac{\partial Y^{nc}(I, t)}{\partial t} / \frac{\partial Y^{nc}(I, t)}{\partial I} |_{I=I^{nc}} > 0$ . Therefore,  $I^{nc}$  continuously increases in  $t$ .

Then, we will show that  $I^{nc}|_{t=0} \leq I^c$  and  $I^{nc}|_{t=\bar{c}-\delta} \geq I^c$ : (1) When  $t = 0$ , one can verify that  $Y^{nc}(I, 0) - Y^c(I) = -(\bar{c} - \delta) \int_{2I}^1 (\int_{4I - \varepsilon_2}^{2I} g_{12}(\varepsilon_1, \varepsilon_2) d\varepsilon_1) d\varepsilon_2 \leq 0$  for any  $I \in [0, 1]$ . Moreover, since  $\frac{\partial Y^{nc}(I, t)}{\partial I} < 0$  and  $\frac{\partial Y^c(I)}{\partial I} < 0$ , we have  $I^{nc}|_{t=0} \leq I^c$ . (2) When  $t = \bar{c} - \delta$ , one can verify that  $Y^{nc}(I, \bar{c} - \delta) - Y^c(I) = (\bar{c} - \delta) (\int_0^{2I} \int_{2I}^{4I - \varepsilon_2} g_{12}(\varepsilon_1, \varepsilon_2) d\varepsilon_1 d\varepsilon_2) \geq 0$  for any  $I \in [0, 1]$ . Since since  $\frac{\partial Y^{nc}(I, t)}{\partial I} < 0$  and  $\frac{\partial Y^c(I)}{\partial I} < 0$ , we have  $I^{nc}|_{t=\bar{c}-\delta} \geq I^c$ .

Combining the above result with the one that  $I^{nc}(t)$  continuously increases in  $t$  and  $I^c$  is independent in  $t$ , we can conclude that there exists a  $t^{nc} \in [0, \bar{c} - \delta]$  such that  $I^{nc}|_{t=t^{nc}} = I^c$ , and thus  $\pi_i^{nc*}|_{t=t^{nc}} = \pi_i^{c*}$ .  $\square$

## D. Exogenous Inventory

In the exogenous inventory case with  $I_1 = I_2 = I \in [0, 1]$ , we define  $\bar{\beta} = \min\{\hat{\beta}_1(I), \hat{\beta}_2(I)\}$  and assume that  $\beta \leq \bar{\beta}$  to ensure that each retailer's profit is non-negative in the equilibrium of both inventory sharing and no-sharing cases. Note that:

$$\hat{\beta}_1(I) = \frac{\sqrt{4k \cdot (p \cdot \mu/2 - \bar{c} \int_{2I}^1 (\varepsilon_i/2 - I)g(\varepsilon_i)d\varepsilon_i - cI)}}{(p\mu - \bar{c} \int_{2I}^1 \varepsilon g(\varepsilon)d\varepsilon)} \text{ and} \quad (A.7)$$

$$\hat{\beta}_2(I) = \min \left\{ \frac{\sqrt{4k \cdot (p \cdot \mu/2 - F_1 - F_2 - F_3 - cI)}}{(p\mu - A - B)}, \frac{\sqrt{k \cdot [(t + \delta)V_0 + (\bar{c} - t)V_1 + (\bar{c} - \delta)E_0]}}{2[I((t + \delta)V_0 + (\bar{c} - t)V_1) + (\bar{c} - 2t - \delta)C_0]} \right\},$$

where  $F_1 = \delta \int_0^{2I} (\int_{2I}^{4I-\varepsilon_2} (\varepsilon_1/2 - I)g_{12}(\varepsilon_1, \varepsilon_2)d\varepsilon_1)d\varepsilon_2$ ,  
 $F_2 = \int_0^{2I} (\int_{4I-\varepsilon_2}^1 (\delta(I - \varepsilon_2/2) + \bar{c}(\varepsilon_1/2 + \varepsilon_2/2 - 2I))g_{12}(\varepsilon_1, \varepsilon_2)d\varepsilon_1)d\varepsilon_2$ ,  $F_3 = \bar{c} \int_{2I}^1 (\int_{2I}^1 (\varepsilon_1/2 - I)g_{12}(\varepsilon_1, \varepsilon_2)d\varepsilon_1)d\varepsilon_2$ ,  
 $A = \int_0^{2I} (\int_{2I}^{4I-\varepsilon_2} (t + \delta)\varepsilon_1 g_{12}(\varepsilon_1, \varepsilon_2)d\varepsilon_1 + \int_{4I-\varepsilon_2}^1 (\bar{c}\varepsilon_1 - \bar{c}\varepsilon_2 + (t + \delta)\varepsilon_2)g_{12}(\varepsilon_1, \varepsilon_2)d\varepsilon_1)d\varepsilon_2$ ,  
 $B = \int_{2I}^1 (\int_0^{4I-\varepsilon_2} t\varepsilon_2 g_{12}(\varepsilon_1, \varepsilon_2)d\varepsilon_1 + \int_{4I-\varepsilon_2}^{2I} t\varepsilon_1 g_{12}(\varepsilon_1, \varepsilon_2)d\varepsilon_1 + \int_{2I}^1 \bar{c}\varepsilon_1 g_{12}(\varepsilon_1, \varepsilon_2))d\varepsilon_2$ ,  
 $V_0 = \int_0^{2I} g_{12}(2I, \varepsilon)d\varepsilon$ ,  $V_1 = \int_{2I}^1 g_{12}(2I, \varepsilon)d\varepsilon$ ,  $C_0 = \int_0^{2I} (2I - \varepsilon)g_{12}(4I - \varepsilon, \varepsilon)d\varepsilon$ , and  $E_0 = \int_0^{2I} g_{12}(4I - \varepsilon, \varepsilon)d\varepsilon$ .

**Proof of Lemma 2.** (a) Retailer  $i$ 's problem in the case without inventory sharing is given by

$$\max_{s_i} \pi_i^N(s_i, I_i | s_j) = p \cdot E[\varepsilon_i \cdot d_i] - \bar{c} \cdot E[(\varepsilon_i \cdot d_i - I_i)^+] - ks_i^2 - cI_i, \text{ for } i, j = 1, 2 \text{ and } i \neq j,$$

where  $d_i = \frac{1}{2} + \beta(s_i - s_j)$ . We can rewrite  $\pi_i^N(s_i, I_i | s_j)$  as:  $\pi_i^N(s_i, I_i | s_j) = p \cdot \mu \cdot d_i - \bar{c} \int_{I_i/d_i}^1 (\varepsilon_i d_i - I_i)g(\varepsilon_i)d\varepsilon_i - ks_i^2 - cI_i$ . We can verify:  $\frac{d^2 \pi_i^N(s_i, I_i | s_j)}{ds_i^2} = -\frac{2b\bar{c}I_i^2 g(\frac{I_i}{d_i})}{(\frac{1}{2\beta} + s_i - s_j)^3} - 2k < 0$ , i.e.,  $\pi_i^N(s_i, I_i | s_j)$  is concave in  $s_i$ .

Therefore, retailer  $i$ 's optimal service quality can be solved from the first-order-condition as below:

$$\frac{d\pi_i^N(s_i, I_i | s_j)}{ds_i} = \beta p \mu - \bar{c} \beta \int_{I/d_i}^1 \varepsilon_i g(\varepsilon_i)d\varepsilon_i - 2ks_i = 0.$$

Solving  $\frac{d\pi_1^N(s_1, I | s_2)}{ds_1} = 0$  and  $\frac{d\pi_2^N(s_2, I | s_1)}{ds_2} = 0$  together, we can get service quality in the symmetric equilibrium:

$$\hat{s}_1^N(I) = \hat{s}_2^N(I) = \hat{s}^N(I) = \frac{\beta(p\mu - \bar{c} \int_{2I}^1 \varepsilon g(\varepsilon)d\varepsilon)}{2k}. \quad (A.8)$$

(b) Taking derivative of  $\hat{s}^N(I)$  with respect to  $I$ ,  $\beta$ , and  $\bar{c}$ :

$$\frac{\partial \hat{s}^N(I)}{\partial I} = \frac{2\beta \bar{c} I g(2I)}{k} > 0, \quad \frac{\partial \hat{s}^N(I)}{\partial \beta} = \frac{p\mu - \bar{c} \int_{2I}^1 \varepsilon g(\varepsilon)d\varepsilon}{2k} > 0, \text{ and } \frac{\partial \hat{s}^N(I)}{\partial \bar{c}} = \frac{-\beta \int_{2I}^1 \varepsilon g(\varepsilon)d\varepsilon}{2k} < 0.$$

Thus,  $\hat{s}^N(I)$  increases in  $I$  and  $\beta$ , and decreases in  $\bar{c}$ .

(c) The corresponding profit of retailer  $i$  in the case without inventory sharing is given as below:

$$\hat{\pi}_i^N(I) = \pi_i^N(\hat{s}^N(I), I | \hat{s}^N(I)) = p \cdot \mu/2 - \bar{c} \int_{2I}^1 (\varepsilon_i/2 - I)g(\varepsilon_i)d\varepsilon_i - k(\hat{s}^N(I))^2 - cI. \quad (A.9)$$

Taking derivative of  $\hat{\pi}_i^N(I)$  with respect to  $I$ ,  $\beta$ , and  $\bar{c}$ :

$$\frac{\partial \hat{\pi}_i^N(I)}{\partial I} = \bar{c} \int_{2I}^1 g(\varepsilon_i)d\varepsilon_i - 2k\hat{s}^N(I) \frac{\partial \hat{s}^N(I)}{\partial I} - c = \bar{c} \int_{2I}^1 g(\varepsilon_i)d\varepsilon_i - 4\beta \hat{s}^N(I) \bar{c} I g(2I) - c,$$

$$\frac{\partial \hat{\pi}_i^N(I)}{\partial \beta} = -2k\hat{s}^N(I) \frac{\partial \hat{s}^N(I)}{\partial \beta} < 0, \text{ and}$$

$$\frac{\partial \hat{\pi}_i^N(I)}{\partial \bar{c}} = -\int_{2I}^1 (\varepsilon_i/2 - I)g(\varepsilon_i)d\varepsilon_i - 2k\hat{s}^N(I) \frac{\partial \hat{s}^N(I)}{\partial \bar{c}} = -\int_{2I}^1 (\varepsilon_i/2 - I)g(\varepsilon_i)d\varepsilon_i + \beta \hat{s}^N(I) \int_{2I}^1 \varepsilon g(\varepsilon)d\varepsilon.$$

One can verify that  $\frac{\partial \hat{\pi}_i^N(I)}{\partial \beta} < 0$ , and  $\frac{\partial \hat{\pi}_i^N(I)}{\partial I}$  and  $\frac{\partial \hat{\pi}_i^N(I)}{\partial \bar{c}}$  could be positive or negative for different given parameters. Thus,  $\hat{\pi}_i^N(I)$  decreases in  $\beta$ , is non-monotone in  $I$  and  $\bar{c}$ .  $\square$

**Proof of Lemma 3.** (a) Retailer  $i$ 's problem under inventory-sharing case is given by

$$\begin{aligned} \max_{s_i} \pi_i(s_i, I_i | s_j, I_j) = & p \cdot E[\varepsilon_i \cdot d_i] + t \cdot E[(\min\{I_i - \varepsilon_i d_i, \varepsilon_j d_j - I_j\})^+] - (t + \delta) \cdot E[(\min\{\varepsilon_i d_i - I_i, I_j - \varepsilon_j d_j\})^+] \\ & - \bar{c} \cdot E[(\varepsilon_i d_i - I_i - (I_j - \varepsilon_j d_j))^+] - k s_i^2 - c I_i, \text{ for } i, j = 1, 2 \text{ and } i \neq j. \end{aligned}$$

The first-order-condition leads to

$$\begin{aligned} \frac{d\pi_i(s_i, I_i | s_j, I_j)}{ds_i} = & -2k s_i + \beta \left( p \int_0^1 \varepsilon_i g_i(\varepsilon_i) d\varepsilon_i - t \int_{\frac{I_j}{d_j}}^1 \left[ \int_0^{\frac{I_i + I_j - \varepsilon_j d_j}{d_i}} \varepsilon_j g_{12}(\varepsilon_i, \varepsilon_j) d\varepsilon_i + \int_{\frac{I_i}{d_i}}^{\frac{I_i + I_j - \varepsilon_j d_j}{d_i}} \varepsilon_i g_{12}(\varepsilon_i, \varepsilon_j) d\varepsilon_i \right] d\varepsilon_j \right. \\ & - (t + \delta) \int_0^{\frac{I_j}{d_j}} \left[ \int_{\frac{I_i + I_j - \varepsilon_j d_j}{d_i}}^1 \varepsilon_j g_{12}(\varepsilon_i, \varepsilon_j) d\varepsilon_i + \int_{\frac{I_i}{d_i}}^{\frac{I_i + I_j - \varepsilon_j d_j}{d_i}} \varepsilon_i g_{12}(\varepsilon_i, \varepsilon_j) d\varepsilon_i \right] d\varepsilon_j \\ & \left. - \bar{c} \left[ \int_0^{\frac{I_j}{d_j}} \int_{\frac{I_i + I_j - \varepsilon_j d_j}{d_i}}^1 (\varepsilon_i - \varepsilon_j) g_{12}(\varepsilon_i, \varepsilon_j) d\varepsilon_i d\varepsilon_j + \int_{\frac{I_j}{d_j}}^1 \int_{\frac{I_i}{d_i}}^1 \varepsilon_i g_{12}(\varepsilon_i, \varepsilon_j) d\varepsilon_i d\varepsilon_j \right] \right) = 0. \end{aligned}$$

Solving  $\frac{d\pi_1(s_1, I | s_2, I)}{ds_1} = 0$  and  $\frac{d\pi_2(s_2, I | s_1, I)}{ds_2} = 0$  together, we can get the service quality in the unique symmetric equilibrium outcome as below:

$$\hat{s}_1(t, I) = \hat{s}_2(t, I) = \hat{s}(t, I) = \frac{\beta \left( \int_0^1 p \varepsilon g(\varepsilon) d\varepsilon - A - B \right)}{2k} = \frac{\beta(p\mu - A - B)}{2k}, \quad (\text{A.10})$$

where  $A = \int_0^{2I} \left( \int_{2I}^{4I - \varepsilon_2} (t + \delta) \varepsilon_1 g_{12}(\varepsilon_1, \varepsilon_2) d\varepsilon_1 + \int_{4I - \varepsilon_2}^1 (\bar{c} \varepsilon_1 - \bar{c} \varepsilon_2 + (t + \delta) \varepsilon_2) g_{12}(\varepsilon_1, \varepsilon_2) d\varepsilon_1 \right) d\varepsilon_2$  and  $B = \int_{2I}^1 \left( \int_0^{4I - \varepsilon_2} t \varepsilon_2 g_{12}(\varepsilon_1, \varepsilon_2) d\varepsilon_1 + \int_{4I - \varepsilon_2}^{2I} t \varepsilon_1 g_{12}(\varepsilon_1, \varepsilon_2) d\varepsilon_1 + \int_{2I}^1 \bar{c} \varepsilon_1 g_{12}(\varepsilon_1, \varepsilon_2) d\varepsilon_2 \right) d\varepsilon_2$ .

Next, we check the second-order condition to show that  $\frac{d^2 \pi_i(s_i, I | s_j, I)}{ds_i^2} \Big|_{s_1 = s_2 = \hat{s}(t, I)} < 0$ . Taking the second derivative of  $\pi_i(s_i, I_i | s_j, I_j)$  with respect to  $s_i$ , we have:

$$\begin{aligned} \frac{d^2 \pi_i(s_i, I_i | s_j, I_j)}{ds_i^2} = & -t\beta^2 \left[ \int_0^{\frac{I_i}{d_i}} (-H) d\varepsilon_i + \int_{\frac{I_j}{d_j}}^1 (-J) d\varepsilon_j + \int_{\frac{I_j}{d_j}}^1 K d\varepsilon_j \right] - (t + \delta)\beta^2 \left[ \int_{\frac{I_i}{d_i}}^1 H d\varepsilon_i + \int_0^{\frac{I_j}{d_j}} J d\varepsilon_j + \int_0^{\frac{I_j}{d_j}} (-K) d\varepsilon_j \right] \\ & - \bar{c}\beta^2 \left[ \int_{\frac{I_i}{d_i}}^1 (-H) d\varepsilon_i + \int_{\frac{I_j}{d_j}}^1 J d\varepsilon_j + \int_0^{\frac{I_j}{d_j}} K d\varepsilon_j \right] - 2k, \end{aligned}$$

where  $H = \frac{I_j^2}{d_j^3} g_{12}(\varepsilon_i, \frac{I_j}{d_j})$ ,  $J = \frac{I_i^2}{d_i^3} g_{12}(\frac{I_i}{d_i}, \varepsilon_j)$ , and  $K = \frac{[I_i + I_j - \varepsilon_j(d_i + d_j)]^2}{d_i^3} g_{12}(\frac{I_i + I_j - \varepsilon_j d_j}{d_i}, \varepsilon_j)$ . Given that  $s_1 = s_2 = \hat{s}(t, I)$  and  $I_1 = I_2 = I$ , we can obtain the follows:  $d_1 = d_2 = \frac{1}{2}$ ,  $H = 8I^2 \cdot g_{12}(\varepsilon_i, 2I)$ ,  $J = 8I^2 \cdot g_{12}(2I, \varepsilon_j) = 8I^2 \cdot g_{12}(\varepsilon_j, 2I)$ , and  $K = 2(4I - 2\varepsilon_j)^2 g_{12}(4I - \varepsilon_j, \varepsilon_j)$ . After simplification, the second-order-condition can be rewritten as below:

$$\begin{aligned} \frac{d^2 \pi_i(s_i, I | s_j, I)}{ds_i^2} \Big|_{s_1 = s_2 = \hat{s}(t, I)} = & (-t\beta^2) \int_{2I}^1 K d\varepsilon_j + (t + \delta - \bar{c})\beta^2 \int_0^{2I} K d\varepsilon_j - \delta\beta^2 \int_0^1 8I^2 \cdot g_{12}(\varepsilon_i, 2I) d\varepsilon_i - 2k. \\ = & -\beta^2 (t \int_{2I}^1 K d\varepsilon_j + (\bar{c} - t - \delta) \int_0^{2I} K d\varepsilon_j + \delta \int_0^1 8I^2 \cdot g_{12}(\varepsilon_i, 2I) d\varepsilon_i) - 2k. \end{aligned}$$

Since  $0 \leq t \leq t + \delta \leq \bar{c}$ , we can show that  $\frac{d^2 \pi_i(s_i, I | s_j, I)}{ds_i^2} \Big|_{s_1 = s_2 = \hat{s}(t, I)} < 0$ .

(b) Taking derivative of  $\hat{s}(t, I)$  with respect to  $t$ ,  $\delta$ ,  $\bar{c}$ ,  $I$ , and  $\beta$ :

$$\begin{aligned} \frac{\partial \hat{s}(t, I)}{\partial t} = & -\beta \frac{\int_0^{2I} \left( \int_{2I}^{4I - \varepsilon_2} \varepsilon_1 g_{12}(\varepsilon_1, \varepsilon_2) d\varepsilon_1 + \int_{4I - \varepsilon_2}^1 \varepsilon_2 g_{12}(\varepsilon_1, \varepsilon_2) d\varepsilon_1 \right) d\varepsilon_2}{2k} \\ & + \frac{\int_{2I}^1 \left( \int_0^{4I - \varepsilon_2} \varepsilon_2 g_{12}(\varepsilon_1, \varepsilon_2) d\varepsilon_1 + \int_{4I - \varepsilon_2}^{2I} \varepsilon_1 g_{12}(\varepsilon_1, \varepsilon_2) d\varepsilon_1 \right) d\varepsilon_2}{2k} < 0, \\ \frac{\partial \hat{s}(t, I)}{\partial \delta} = & -\beta \frac{\int_0^{2I} \left( \int_{2I}^{4I - \varepsilon_2} \varepsilon_1 g_{12}(\varepsilon_1, \varepsilon_2) d\varepsilon_1 + \int_{4I - \varepsilon_2}^1 \varepsilon_2 g_{12}(\varepsilon_1, \varepsilon_2) d\varepsilon_1 \right) d\varepsilon_2}{2k} < 0, \\ \frac{\partial \hat{s}(t, I)}{\partial \bar{c}} = & -\beta \frac{\int_0^{2I} \left( \int_{4I - \varepsilon_2}^1 (\varepsilon_1 - \varepsilon_2) g_{12}(\varepsilon_1, \varepsilon_2) d\varepsilon_1 \right) d\varepsilon_2 + \int_{2I}^1 \left( \int_{2I}^1 \varepsilon_1 g_{12}(\varepsilon_1, \varepsilon_2) \right) d\varepsilon_2}{2k} < 0, \\ \frac{\partial \hat{s}(t, I)}{\partial \beta} = & \frac{(p\mu - A - B)}{2k} > 0, \text{ and } \frac{\partial \hat{s}(t, I)}{\partial I} = \frac{\beta(X_1 + X_2)}{k}, \end{aligned}$$

where  $A$  and  $B$  are given in part (a),  $X_1 = \int_0^{2I} 2(2t + \delta)I g_{12}(\varepsilon_1, 2I) + 4(\bar{c} - t - \delta)(2I - \varepsilon_1)g_{12}(\varepsilon_1, 4I - \varepsilon_1)d\varepsilon_1$ , and  $X_2 = \int_{2I}^1 2(2\bar{c} - 2t - \delta)I g_{12}(\varepsilon_1, 2I) + 4t(2I - \varepsilon_1)g_{12}(\varepsilon_1, 4I - \varepsilon_1)d\varepsilon_1$ .

According to Lemma A.1 (c), we can easily show that  $\int_{2I}^1 4t(2I - \varepsilon_1)g_{12}(\varepsilon_1, 4I - \varepsilon_1)d\varepsilon_1 = -\int_0^{2I} 4t(2I - \varepsilon_1)g_{12}(\varepsilon_1, 4I - \varepsilon_1)d\varepsilon_1$ . Thus,  $\frac{\partial \hat{s}(t, I)}{\partial I}$  can be simplified as below:

$$\frac{\partial \hat{s}(t, I)}{\partial I} = \beta \frac{\int_0^{2I} (2I(2t + \delta)g_{12}(\varepsilon_1, 2I) + 4(\bar{c} - 2t - \delta)(2I - \varepsilon_1)g_{12}(\varepsilon_1, 4I - \varepsilon_1)d\varepsilon_1 + \int_{2I}^1 2I(2\bar{c} - 2t - \delta)g_{12}(\varepsilon_1, 2I)d\varepsilon_1}{k}.$$

Therefore,  $\hat{s}(t, I)$  increases in  $\beta$ , and decreases in  $t$ ,  $\delta$ , and  $\bar{c}$ ; and  $\hat{s}(t, I)$  increases in  $I$  when  $t \leq \frac{\bar{c} - \delta}{2}$  and could be non-monotone in  $I$  when  $t > \frac{\bar{c} - \delta}{2}$ .

(c) The corresponding profit of retailer  $i$  in the case with inventory sharing is given as below:

$$\begin{aligned} \hat{\pi}_i(t, I) &= \pi_i(\hat{s}(t, I), I) \hat{s}(t, I), I = p \cdot \mu/2 + t \int_{2I}^1 \left( \int_0^{4I - \varepsilon_2} (\varepsilon_2/2 - I)g_{12}(\varepsilon_1, \varepsilon_2)d\varepsilon_1 \right) d\varepsilon_2 + t \int_{2I}^1 \left( \int_{4I - \varepsilon_2}^{2I} (I - \varepsilon_1/2)g_{12}(\varepsilon_1, \varepsilon_2)d\varepsilon_1 \right) d\varepsilon_2 \\ &\quad - \int_0^{2I} \left( \int_{4I - \varepsilon_2}^1 ((t + \delta)(I - \varepsilon_2/2) + \bar{c}(\varepsilon_1/2 + \varepsilon_2/2 - 2I))g_{12}(\varepsilon_1, \varepsilon_2)d\varepsilon_1 \right) d\varepsilon_2 \\ &\quad - (t + \delta) \int_0^{2I} \left( \int_{2I}^{4I - \varepsilon_2} (\varepsilon_1/2 - I)g_{12}(\varepsilon_1, \varepsilon_2)d\varepsilon_1 \right) d\varepsilon_2 - \bar{c} \int_{2I}^1 \left( \int_{2I}^1 (\varepsilon_1/2 - I)g_{12}(\varepsilon_1, \varepsilon_2)d\varepsilon_1 \right) d\varepsilon_2 - k\hat{s}^2(I) - cI. \end{aligned}$$

According to Lemma A.1(a)-(b),  $t \int_{2I}^1 \left( \int_0^{4I - \varepsilon_2} (\varepsilon_2/2 - I)g_{12}(\varepsilon_1, \varepsilon_2)d\varepsilon_1 \right) d\varepsilon_2 = t \int_0^{2I} \left( \int_{2I}^{4I - \varepsilon_2} (\varepsilon_1/2 - I)g_{12}(\varepsilon_1, \varepsilon_2)d\varepsilon_1 \right) d\varepsilon_2$  and  $t \int_{2I}^1 \left( \int_{4I - \varepsilon_2}^{2I} (I - \varepsilon_1/2)g_{12}(\varepsilon_1, \varepsilon_2)d\varepsilon_1 \right) d\varepsilon_2 = t \int_0^{2I} \left( \int_{4I - \varepsilon_2}^1 (I - \varepsilon_2/2)g_{12}(\varepsilon_1, \varepsilon_2)d\varepsilon_1 \right) d\varepsilon_2$ . After simplification, we can rewrite  $\hat{\pi}_i(t, I)$  as below:

$$\begin{aligned} \hat{\pi}_i(t, I) &= p \cdot \mu/2 - \delta \int_0^{2I} \left( \int_{2I}^{4I - \varepsilon_2} (\varepsilon_1/2 - I)g_{12}(\varepsilon_1, \varepsilon_2)d\varepsilon_1 \right) d\varepsilon_2 \\ &\quad - \int_0^{2I} \left( \int_{4I - \varepsilon_2}^1 (\delta(I - \varepsilon_2/2) + \bar{c}(\varepsilon_1/2 + \varepsilon_2/2 - 2I))g_{12}(\varepsilon_1, \varepsilon_2)d\varepsilon_1 \right) d\varepsilon_2 \\ &\quad - \bar{c} \int_{2I}^1 \left( \int_{2I}^1 (\varepsilon_1/2 - I)g_{12}(\varepsilon_1, \varepsilon_2)d\varepsilon_1 \right) d\varepsilon_2 - k\hat{s}^2(I) - cI. \end{aligned} \tag{A.11}$$

Taking derivative with respect to  $t$ , we have:  $\frac{\partial \hat{\pi}_i(t, I)}{\partial t} = -2k\hat{s}(t, I) \frac{\partial \hat{s}(t, I)}{\partial t} > 0$ . Thus,  $\hat{\pi}_i(t, I)$  increases in  $t$ .

Taking derivative of  $\hat{\pi}_i(t, I)$  with respect to  $\delta$ :

$$\frac{\partial \hat{\pi}_i(t, I)}{\partial \delta} = - \underbrace{\int_0^{2I} \left( \int_{2I}^{4I - \varepsilon_2} (\varepsilon_1/2 - I)g_{12}(\varepsilon_1, \varepsilon_2)d\varepsilon_1 \right) d\varepsilon_2}_{\text{First Term}} + \underbrace{\int_{4I - \varepsilon_2}^1 (I - \varepsilon_2/2)g_{12}(\varepsilon_1, \varepsilon_2)d\varepsilon_1}_{\text{Second Term}} - 2k\hat{s}(t, I) \frac{\partial \hat{s}(t, I)}{\partial \delta}.$$

The first term in  $\frac{\partial \hat{\pi}_i(t, I)}{\partial \delta}$  is negative and the second term is positive. And one can easily verify that  $\frac{\partial \hat{\pi}_i(t, I)}{\partial \delta}$  could be negative or positive. Thus,  $\hat{\pi}_i(t, I)$  is non-monotone in  $\delta$ .

Taking derivative of  $\hat{\pi}_i(t, I)$  with respect to  $\bar{c}$ :

$$\frac{\partial \hat{\pi}_i(t, I)}{\partial \bar{c}} = - \underbrace{\int_0^{2I} \left( \int_{4I - \varepsilon_2}^1 (\varepsilon_1/2 + \varepsilon_2/2 - 2I)g_{12}(\varepsilon_1, \varepsilon_2)d\varepsilon_1 \right) d\varepsilon_2}_{\text{First Term}} - \underbrace{\int_{2I}^1 \left( \int_{2I}^1 (\varepsilon_1/2 - I)g_{12}(\varepsilon_1, \varepsilon_2)d\varepsilon_1 \right) d\varepsilon_2}_{\text{Second Term}} - 2k\hat{s}(t, I) \frac{\partial \hat{s}(t, I)}{\partial \bar{c}}.$$

The first and second terms in  $\frac{\partial \hat{\pi}_i(t, I)}{\partial \bar{c}}$  are negative and the third term is positive. And one can easily verify that  $\frac{\partial \hat{\pi}_i(t, I)}{\partial \bar{c}}$  could be negative or positive. Thus,  $\hat{\pi}_i(t, I)$  is non-monotone in  $\bar{c}$ .

Taking derivative of  $\hat{\pi}_i(t, I)$  with respect to  $\beta$ , we have  $\frac{\partial \hat{\pi}_i(t, I)}{\partial \beta} = -2k\hat{s}(t, I) \frac{\partial \hat{s}(t, I)}{\partial \beta} < 0$ . Thus,  $\hat{\pi}_i(t, I)$  decreases in  $\beta$ .

Taking derivative of  $\hat{\pi}_i(t, I)$  with respect to  $I$ :

$$\begin{aligned} \frac{\partial \hat{\pi}_i(t, I)}{\partial I} &= \int_0^{2I} \left( \int_{2I}^{4I - \varepsilon_2} (t + \delta)g_{12}(\varepsilon_1, \varepsilon_2)d\varepsilon_1 \right) d\varepsilon_2 + \int_{4I - \varepsilon_2}^1 (2\bar{c} - t - \delta)g_{12}(\varepsilon_1, \varepsilon_2)d\varepsilon_1 d\varepsilon_2 \\ &\quad + \int_{2I}^1 \left( - \int_0^{4I - \varepsilon_2} t g_{12}(\varepsilon_1, \varepsilon_2)d\varepsilon_1 + \int_{4I - \varepsilon_2}^{2I} t g_{12}(\varepsilon_1, \varepsilon_2)d\varepsilon_1 + \int_{2I}^1 \bar{c} g_{12}(\varepsilon_1, \varepsilon_2)d\varepsilon_1 \right) d\varepsilon_2 - 2k\hat{s}(t, I) \frac{\partial \hat{s}(t, I)}{\partial I} - c. \end{aligned}$$

$\frac{\partial \hat{\pi}_i(t, I)}{\partial I}$  could be positive or negative, and thus  $\hat{\pi}_i(t, I)$  is non-monotone in  $I$ .  $\square$

**Proof of Proposition 1.** (a)  $\hat{s}^N(I)$  and  $\hat{s}(t, I)$  are given by Equations (A.8) and (A.10), respectively.

$$\begin{aligned}
\hat{s}(t, I) - \hat{s}^N(I) &= \frac{\beta(p\mu - A - B)}{2k} - \frac{\beta(p\mu - \bar{c} \int_{2I}^1 \varepsilon g(\varepsilon) d\varepsilon)}{2k} = \frac{\beta(-A - B + \bar{c} \int_{2I}^1 \varepsilon g(\varepsilon) d\varepsilon)}{2k} \\
&= \beta \frac{-A - B + \bar{c} \int_0^{2I} (\int_{2I}^1 \varepsilon_1 g_{12}(\varepsilon_1, \varepsilon_2) d\varepsilon_1) d\varepsilon_2 + \bar{c} \int_{2I}^1 (\int_{2I}^1 \varepsilon_1 g_{12}(\varepsilon_1, \varepsilon_2) d\varepsilon_1) d\varepsilon_2}{2k} \\
&= \beta \left( \frac{\int_0^{2I} (\int_{2I}^{4I-\varepsilon_2} (\bar{c} - t - \delta) \varepsilon_1 g_{12}(\varepsilon_1, \varepsilon_2) d\varepsilon_1 + \int_{4I-\varepsilon_2}^1 (\bar{c} - t - \delta) \varepsilon_2 g_{12}(\varepsilon_1, \varepsilon_2) d\varepsilon_1) d\varepsilon_2}{2k} \right. \\
&\quad \left. - \frac{\int_{2I}^1 (\int_0^{4I-\varepsilon_2} t \varepsilon_2 g_{12}(\varepsilon_1, \varepsilon_2) d\varepsilon_1 + \int_{4I-\varepsilon_2}^{2I} t \varepsilon_1 g_{12}(\varepsilon_1, \varepsilon_2) d\varepsilon_1) d\varepsilon_2}{2k} \right) \\
&= \beta \frac{\int_0^{2I} (\int_{2I}^{4I-\varepsilon_2} (\bar{c} - 2t - \delta) \varepsilon_1 g_{12}(\varepsilon_1, \varepsilon_2) d\varepsilon_1 + \int_{4I-\varepsilon_2}^1 (\bar{c} - 2t - \delta) \varepsilon_2 g_{12}(\varepsilon_1, \varepsilon_2) d\varepsilon_1) d\varepsilon_2}{2k} \\
&\quad \text{(according to Lemma A.1 (a) and (b))} \\
&= (\bar{c} - 2t - \delta) \beta \frac{\int_0^{2I} (\int_{2I}^{4I-\varepsilon_2} \varepsilon_1 g_{12}(\varepsilon_1, \varepsilon_2) d\varepsilon_1 + \int_{4I-\varepsilon_2}^1 \varepsilon_2 g_{12}(\varepsilon_1, \varepsilon_2) d\varepsilon_1) d\varepsilon_2}{2k},
\end{aligned}$$

where  $A$  and  $B$  are given in Lemma 3(a).

Thus,  $\hat{s}(t, I) > \hat{s}^N(I)$  when  $t < \frac{\bar{c}-\delta}{2}$  and  $\hat{s}(t, I) < \hat{s}^N(I)$  when  $t > \frac{\bar{c}-\delta}{2}$ .

(b)&(c)  $\hat{\pi}_i^N(I)$  and  $\hat{\pi}_i(t, I)$  are given by Equations (A.9) and (A.11), respectively. Thus, we have:

$$\hat{\Delta}(t, I) = \hat{\pi}_i(t, I) - \hat{\pi}_i^N(I) = \underbrace{\hat{R}(t, I) - \hat{R}^N(I)}_{\text{First Term}} - \underbrace{k((\hat{s}(t, I))^2 - (\hat{s}^N(I))^2)}_{\text{Second Term}}.$$

where  $\hat{R}^N(I) = p \cdot \mu / 2 - \bar{c} \int_{2I}^1 (\varepsilon_i / 2 - I) g(\varepsilon_i) d\varepsilon_i$  and  $\hat{R}(t, I) = p \cdot \mu / 2 - \delta \int_0^{2I} (\int_{2I}^{4I-\varepsilon_2} (\varepsilon_1 / 2 - I) g_{12}(\varepsilon_1, \varepsilon_2) d\varepsilon_1) d\varepsilon_2 - \int_0^{2I} (\int_{4I-\varepsilon_2}^1 (\delta(I - \varepsilon_2 / 2) + \bar{c}(\varepsilon_1 / 2 + \varepsilon_2 / 2 - 2I)) g_{12}(\varepsilon_1, \varepsilon_2) d\varepsilon_1) d\varepsilon_2 - \bar{c} \int_{2I}^1 (\int_{2I}^1 (\varepsilon_1 / 2 - I) g_{12}(\varepsilon_1, \varepsilon_2) d\varepsilon_1) d\varepsilon_2$ .

After simplification, we have:

$$\begin{aligned}
\hat{R}(t, I) - \hat{R}^N(I) &= -\delta \int_0^{2I} (\int_{2I}^{4I-\varepsilon_2} (\varepsilon_1 / 2 - I) g_{12}(\varepsilon_1, \varepsilon_2) d\varepsilon_1) d\varepsilon_2 \\
&\quad - \int_0^{2I} (\int_{4I-\varepsilon_2}^1 (\delta(I - \varepsilon_2 / 2) + \bar{c}(\varepsilon_1 / 2 + \varepsilon_2 / 2 - 2I)) g_{12}(\varepsilon_1, \varepsilon_2) d\varepsilon_1) d\varepsilon_2 \\
&\quad - \bar{c} \int_{2I}^1 (\int_{2I}^1 (\varepsilon_1 / 2 - I) g_{12}(\varepsilon_1, \varepsilon_2) d\varepsilon_1) d\varepsilon_2 \\
&\quad + \bar{c} \int_0^{2I} (\int_{2I}^1 (\varepsilon_1 / 2 - I) g_{12}(\varepsilon_1, \varepsilon_2) d\varepsilon_1) d\varepsilon_2 + \bar{c} \int_{2I}^1 (\int_{2I}^1 (\varepsilon_1 / 2 - I) g_{12}(\varepsilon_1, \varepsilon_2) d\varepsilon_1) d\varepsilon_2 \\
&= (\bar{c} - \delta) \int_0^{2I} (\int_{2I}^{4I-\varepsilon_2} (\varepsilon_1 / 2 - I) g_{12}(\varepsilon_1, \varepsilon_2) d\varepsilon_1 + \int_{4I-\varepsilon_2}^1 (I - \varepsilon_2 / 2) g_{12}(\varepsilon_1, \varepsilon_2) d\varepsilon_1) d\varepsilon_2, \\
(\hat{s}(t, I))^2 - (\hat{s}^N(I))^2 &= \beta^2 \left( \left( \frac{p\mu - A - B}{2k} \right)^2 - \left( \frac{p\mu - \bar{c} \int_{2I}^1 \varepsilon g(\varepsilon) d\varepsilon}{2k} \right)^2 \right) = \beta^2 ((\hat{S}(t, I))^2 - (\hat{S}^N(I))^2).
\end{aligned}$$

where  $\hat{S}(t, I) = \frac{p\mu - A - B}{2k}$  and  $\hat{S}^N(I) = \frac{p\mu - \bar{c} \int_{2I}^1 \varepsilon g(\varepsilon) d\varepsilon}{2k}$ .

Thus, the first term in  $\hat{\Delta}(t, I)$  is positive and independent in  $t$ , i.e.,  $\hat{R}(t, I) - \hat{R}^N(I) > 0$  and is independent in  $t$  and  $\beta$ ; the second term  $-k((\hat{s}(t, I))^2 - (\hat{s}^N(I))^2)$  increases in  $t$  since  $\hat{s}(t, I)$  decreases in  $t$  and  $\hat{s}^N(I)$  is independent in  $t$ . Moreover, according to part (a), the second term is negative (i.e.,  $\hat{s}(t, I) > \hat{s}^N(I)$ ) when  $t < \frac{\bar{c}-\delta}{2}$  and is positive (i.e.,  $\hat{s}(t, I) < \hat{s}^N(I)$ ) when  $t > \frac{\bar{c}-\delta}{2}$ .

Therefore,  $\hat{\Delta}(t, I)$  increases in  $t$ , and  $\hat{\Delta}(\frac{\bar{c}-\delta}{2}, I) > 0$ . Hence, there exists a unique  $\hat{t}(\beta) \in [0, \frac{\bar{c}-\delta}{2}]$  such that  $\hat{\Delta}(t, I) \geq 0$  when  $t \geq \hat{t}(\beta)$ , and  $\hat{\Delta}(t, I) < 0$  otherwise.

In addition, one can also easily verify that the first term in  $\hat{\Delta}(t, I)$  is positive and independent in  $\beta$ . According to part (a),  $\hat{s}(t, I) = \beta \hat{S}(t, I) > \hat{s}^N(I) = \beta \hat{S}^N(I) > 0$  if  $t < \frac{\bar{c}-\delta}{2}$  and  $0 < \hat{s}(t, I) = \beta \hat{S}(t, I) < \hat{s}^N(I) = \beta \hat{S}^N(I)$  if  $t > \frac{\bar{c}-\delta}{2}$ . Thus, the second term  $-k((\hat{s}(t, I))^2 - (\hat{s}^N(I))^2) = -k\beta^2((\hat{S}(t, I))^2 - (\hat{S}^N(I))^2)$  is negative and decreases in  $\beta$  when  $t < \frac{\bar{c}-\delta}{2}$ , and it is positive and increases in  $\beta$  when  $t > \frac{\bar{c}-\delta}{2}$ . Hence,  $\hat{\Delta}(t, I)$

decreases in  $\beta$  when  $t < \frac{\bar{c}-\delta}{2}$ ; and  $\hat{\Delta}(t, I) > 0$  and increases in  $\beta$  when  $t > \frac{\bar{c}-\delta}{2}$ . Moreover, when  $t < \frac{\bar{c}-\delta}{2}$ , there exists  $\hat{\beta}(t) = \sqrt{\frac{\hat{R}(t, I) - \hat{R}^N(I)}{k((\hat{S}(t, I))^2 - (\hat{S}^N(I))^2)}}$  such that,  $\hat{\Delta}(t, I) < 0$  iff  $\beta > \hat{\beta}(t)$  and  $\hat{\Delta}(t, I) > 0$  iff  $\beta < \hat{\beta}(t)$ .

This completes the proof of Proposition 1.  $\square$

**Proof of Corollary 1.** The proof follows directly from Proposition 1 (a) and (b).  $\square$

**Proof of Proposition 2.** As shown in Lemma 3(c), each retailer's profit in the sharing case  $\hat{\pi}_i(t, I)$  increases in  $t$  for  $t \in [0, \bar{c} - \delta]$ . Thus, the optimal transfer price is  $\hat{t}^* = \bar{c} - \delta$ . As shown in Proposition 1(b),  $\hat{\Delta}(t, I) = \hat{\pi}_i(t, I) - \hat{\pi}_i^N(I) > 0$  when  $t > \hat{t}(\beta)$ . Since  $\hat{t}^* = \bar{c} - \delta > \frac{\bar{c}-\delta}{2} > \hat{t}(\beta)$ , the retailers prefer to share inventory at the transfer price  $\hat{t}^*$ . In addition, in the centralized system,  $s_1^c = s_2^c = 0$ . However,  $\hat{s}(t, I) > 0$  for any  $t$  given that  $\beta > 0$ . Thus, one can easily verify that  $\hat{\pi}_i(t, I) < \pi_i^c(I, I)$  (where  $\pi_i^c(I, I)$  is given by Equation (A.1)) holds for any  $t \in [0, \bar{c} - \delta]$ , i.e., coordination cannot be achieved.  $\square$

## E. Endogenous Inventory

In the endogenous inventory case, we define  $\bar{\beta} = \min\{\hat{\beta}_1(\tilde{I}^N), \hat{\beta}_2(\tilde{I})\}$  and assume that  $\beta \leq \bar{\beta}$  to ensure that each retailer's profit is non-negative in the equilibrium of both inventory sharing and no-sharing cases. Note that  $\hat{\beta}_1(\cdot)$  and  $\hat{\beta}_2(\cdot)$  are defined in Equation (A.7), and  $\tilde{I}^N$  and  $\tilde{I}$  are defined in Equations (A.12) and (A.14).

**Proof of Lemma 4.** (a) Retailer  $i$ 's problem in the case without inventory sharing is given by

$$\max_{s_i, I_i} \pi_i^N(s_i, I_i | s_j) = p \cdot E[\varepsilon_i \cdot d_i] - \bar{c} \cdot E[(\varepsilon_i \cdot d_i - I_i)^+] - ks_i^2 - cI_i, \text{ for } i, j = 1, 2 \text{ and } i \neq j.$$

Note that  $d_i = \frac{1}{2} + \beta(s_i - s_j)$ . We can rewrite  $\pi_i^N(s_i, I_i | s_j)$  as:  $\pi_i^N(s_i, I_i | s_j) = p \cdot \mu \cdot d_i - \bar{c} \int_{I/d_i}^1 (\varepsilon_i d_i - I_i) g(\varepsilon_i) d\varepsilon_i - ks_i^2 - cI_i$ . We first check the second-order condition:

$$\begin{aligned} \frac{d^2 \pi_i^N(s_i, I_i | s_j)}{ds_i^2} &= -\frac{\beta^2 \bar{c} I_i^2 g(\frac{I_i}{d_i})}{d_i^3} - 2k < 0, & \frac{d^2 \pi_i^N(s_i, I_i | s_j)}{dI_i^2} &= -\frac{\bar{c}}{d_i} g(\frac{I_i}{d_i}) < 0, \\ \frac{d^2 \pi_i^N(s_i, I_i | s_j)}{dI_i ds_i} &= \frac{\beta \bar{c} I_i g(\frac{I_i}{d_i})}{d_i^2}, & \text{and } \frac{d^2 \pi_i^N(s_i, I_i | s_j)}{ds_i^2} \frac{d^2 \pi_i(s_i, I_i | s_j)}{dI_i^2} - \left(\frac{d^2 \pi_i^N(s_i, I_i | s_j)}{dI_i ds_i}\right)^2 &= \frac{2k \bar{c} g(\frac{I_i}{d_i})}{d_i} \geq 0. \end{aligned}$$

Thus,  $\pi_i^N(s_i, I_i | s_j)$  is jointly concave in  $s_i$  and  $I_i$ . Therefore, each retailer's optimal inventory and service quality can be solved by considering the first-order-condition as below:

$$\frac{d\pi_i^N(s_i, I_i | s_j)}{dI_i} = \bar{c} \int_{I/d_i}^1 g(\varepsilon) d\varepsilon - c = \bar{c}(1 - G(I/d_i)) - c = 0 \text{ and } \frac{d\pi_i^N(s_i, I_i | s_j)}{ds_i} = \beta p \mu - \bar{c} \beta \int_{I/d_i}^1 \varepsilon_i g(\varepsilon_i) d\varepsilon_i - 2ks_i = 0.$$

Solving  $\frac{d\pi_1^N(s_1, I_1 | s_2)}{dI_1} = 0$ ,  $\frac{d\pi_1^N(s_1, I_1 | s_2)}{ds_1} = 0$ ,  $\frac{d\pi_2^N(s_2, I_2 | s_1)}{dI_2} = 0$ , and  $\frac{d\pi_2^N(s_2, I_2 | s_1)}{ds_2} = 0$  together (simultaneously), we can get the unique symmetric equilibrium outcome as below:

$$I_1 = I_2 = \tilde{I}^N = \frac{G^{-1}(1 - \frac{c}{\bar{c}})}{2} \text{ and } s_1 = s_2 = \tilde{s}^N = \hat{s}^N(\tilde{I}^N) = \frac{\beta(p\mu - \bar{c} \int_{2\tilde{I}^N}^1 \varepsilon g(\varepsilon) d\varepsilon)}{2k}. \quad (\text{A.12})$$

(b) According to the proof of part (a),  $\tilde{I}^N$  is solved from  $\bar{c}(1 - G(2I)) - c = 0$ . Define  $Y^N(I, \bar{c}) = \bar{c}(1 - G(2I)) - c$ . Obviously,  $\tilde{I}^N$  is independent in  $\beta$ . According to Chain Rule,

$$\frac{\partial \tilde{I}^N}{\partial \bar{c}} = -\frac{\partial Y^N(I, \bar{c})}{\partial \bar{c}} / \frac{\partial Y^N(I, \bar{c})}{\partial I} \Big|_{I=\tilde{I}^N} = \frac{1 - G(2I)}{2\bar{c}g(2I)} \Big|_{I=\tilde{I}^N} \geq 0.$$

Therefore,  $\tilde{I}^N$  increases in  $\bar{c}$ .

(c) Taking derivative of  $\tilde{s}^N$  with respect to  $\bar{c}$  and  $\beta$ :  $\frac{\partial \tilde{s}^N}{\partial \beta} = \frac{\partial \hat{s}^N(\tilde{I}^N)}{\partial \beta} > 0$  (According to Lemma 2), and

$$\begin{aligned} \frac{\partial \tilde{s}^N}{\partial \bar{c}} &= \frac{\partial \hat{s}^N(\tilde{I}^N)}{\partial \bar{c}} = \left( \frac{\partial \hat{s}^N(I)}{\partial \bar{c}} + \frac{\partial \hat{s}^N(I)}{\partial I} \frac{\partial \tilde{I}^N}{\partial \bar{c}} \right) \Big|_{I=\tilde{I}^N} \\ &= \left( \frac{-\beta \int_{2I}^1 \varepsilon g(\varepsilon) d\varepsilon}{2k} + \frac{\bar{c} \beta I g(2I)}{k} \frac{1 - G(2I)}{\bar{c} g(2I)} \right) \Big|_{I=\tilde{I}^N} = -\left( \frac{\beta \int_{2I}^1 (\frac{\varepsilon}{2} - I) g(\varepsilon) d\varepsilon}{k} \right) \Big|_{I=\tilde{I}^N} \leq 0. \end{aligned}$$

Therefore,  $\tilde{s}^N$  decrease in  $\bar{c}$  and increases in  $\beta$ .

(d) The corresponding profit of retailer  $i$  in the case without inventory sharing is given as below:

$$\tilde{\pi}_i^N = \pi_i^N(\tilde{s}^N, \tilde{I}^N | \tilde{s}^N) = p \cdot \mu/2 - \bar{c} \int_{2\tilde{I}^N}^1 (\varepsilon/2 - \tilde{I}^N)g(\varepsilon)d\varepsilon - k(\tilde{s}^N)^2 - c\tilde{I}^N = \hat{\pi}^N(\tilde{I}^N). \quad (\text{A.13})$$

Taking derivative of  $\tilde{\pi}_i^N$  with respect to  $\beta$  and  $\bar{c}$ :  $\frac{\partial \tilde{\pi}_i^N}{\partial \beta} = -2k\tilde{s}^N \frac{\partial \tilde{s}^N}{\partial \beta} < 0$  and

$$\begin{aligned} \frac{\partial \tilde{\pi}_i^N}{\partial \bar{c}} &= \frac{\partial \hat{\pi}^N(\tilde{I}^N)}{\partial \bar{c}} = \left( \frac{\partial \hat{\pi}_i^N(I)}{\partial \bar{c}} + \frac{\partial \hat{\pi}_i^N(I)}{\partial I} \frac{\partial \tilde{I}^N}{\partial \bar{c}} \right) \Big|_{I=\tilde{I}^N} \\ &= \left( - \int_{2I}^1 (\varepsilon_i/2 - I)g(\varepsilon_i)d\varepsilon_i + \beta \hat{s}^N(I) \int_{2I}^1 \varepsilon g(\varepsilon)d\varepsilon + (\bar{c} \int_{2I}^1 g(\varepsilon_i)d\varepsilon_i - 4\beta \hat{s}^N(I)\bar{c}I g(2I) - c) \frac{1 - G(2I)}{2\bar{c}g(2I)} \right) \Big|_{I=\tilde{I}^N}. \end{aligned}$$

Since  $\frac{\partial \tilde{\pi}_i^N}{\partial \bar{c}}$  can be positive or negative and  $\frac{\partial \tilde{\pi}_i^N}{\partial \beta} < 0$ ,  $\tilde{\pi}_i^N$  is non-monotone in  $\bar{c}$  and decreases in  $\beta$ .

This completes the proof of Lemma 4.  $\square$

**Proof of Lemma 5.** (a) Retailer  $i$ 's problem in the case with inventory sharing is given by

$$\begin{aligned} \max_{I_i, s_i} \pi_i(s_i, I_i | s_j, I_j) &= p \cdot E[\varepsilon_i \cdot d_i] + t \cdot E[(\min\{I_i - \varepsilon_i d_i, \varepsilon_j d_j - I_j\})^+] - (t + \delta) \cdot E[(\min\{\varepsilon_i d_i - I_i, I_j - \varepsilon_j d_j\})^+] \\ &\quad - \bar{c} \cdot E[(\varepsilon_i d_i - I_i - (I_j - \varepsilon_j d_j)^+)^+] - ks_i^2 - cI_i, \text{ for } i, j = 1, 2 \text{ and } i \neq j. \end{aligned}$$

The first-order-condition leads to

$$\begin{aligned} \frac{d\pi_i(s_i, I_i | s_j, I_j)}{ds_i} &= -2ks_i + \beta p \int_0^1 \varepsilon_i g_i(\varepsilon_i)d\varepsilon_i - \beta t \int_{\frac{I_j}{d_j}}^1 \left[ \int_0^{\frac{I_i+I_j-\varepsilon_j d_j}{d_i}} \varepsilon_j g_{12}(\varepsilon_i, \varepsilon_j)d\varepsilon_i + \int_{\frac{I_i+I_j-\varepsilon_j d_j}{d_i}}^{\frac{I_i}{d_i}} \varepsilon_i g_{12}(\varepsilon_i, \varepsilon_j)d\varepsilon_i \right] d\varepsilon_j \\ &\quad - \beta(t + \delta) \int_0^{\frac{I_j}{d_j}} \left[ \int_{\frac{I_i+I_j-\varepsilon_j d_j}{d_i}}^1 \varepsilon_j g_{12}(\varepsilon_i, \varepsilon_j)d\varepsilon_i + \int_{\frac{I_i}{d_i}}^{\frac{I_i+I_j-\varepsilon_j d_j}{d_i}} \varepsilon_i g_{12}(\varepsilon_i, \varepsilon_j)d\varepsilon_i \right] d\varepsilon_j \\ &\quad - \beta \bar{c} \left[ \int_0^{\frac{I_j}{d_j}} \int_{\frac{I_i+I_j-\varepsilon_j d_j}{d_i}}^1 (\varepsilon_i - \varepsilon_j)g_{12}(\varepsilon_i, \varepsilon_j)d\varepsilon_i d\varepsilon_j + \int_{\frac{I_j}{d_j}}^1 \int_{\frac{I_i}{d_i}}^{\frac{I_i+I_j-\varepsilon_j d_j}{d_i}} \varepsilon_i g_{12}(\varepsilon_i, \varepsilon_j)d\varepsilon_i d\varepsilon_j \right] = 0 \quad \text{and} \\ \frac{d\pi_i(s_i, I_i | s_j, I_j)}{dI_i} &= t \int_{\frac{I_j}{d_j}}^1 \int_{\frac{I_i+I_j-\varepsilon_j d_j}{d_i}}^{\frac{I_i}{d_i}} g_{12}(\varepsilon_i, \varepsilon_j)d\varepsilon_i d\varepsilon_j + (t + \delta) \int_0^{\frac{I_j}{d_j}} \int_{\frac{I_i}{d_i}}^{\frac{I_i+I_j-\varepsilon_j d_j}{d_i}} g_{12}(\varepsilon_i, \varepsilon_j)d\varepsilon_i d\varepsilon_j \\ &\quad + \bar{c} \left[ \int_0^{\frac{I_j}{d_j}} \int_{\frac{I_i+I_j-\varepsilon_j d_j}{d_i}}^1 g_{12}(\varepsilon_i, \varepsilon_j)d\varepsilon_i d\varepsilon_j + \int_{\frac{I_j}{d_j}}^1 \int_{\frac{I_i}{d_i}}^{\frac{I_i+I_j-\varepsilon_j d_j}{d_i}} g_{12}(\varepsilon_i, \varepsilon_j)d\varepsilon_i d\varepsilon_j \right] - c = 0. \end{aligned}$$

Solving  $\frac{d\pi_1(s_1, I_1 | s_2, I_2)}{ds_1} = 0$ ,  $\frac{d\pi_1(s_1, I_1 | s_2, I_2)}{dI_1} = 0$ ,  $\frac{d\pi_2(s_2, I_2 | s_1, I_1)}{ds_2} = 0$ , and  $\frac{d\pi_2(s_2, I_2 | s_1, I_1)}{dI_2} = 0$  together (simultaneously), we can get the retailers' inventory and service quality in the symmetric equilibrium:  $I_1 = I_2 = \tilde{I}(t)$  and  $s_1 = s_2 = \tilde{s}(t) = \hat{s}(t, \tilde{I}(t))$ , where  $\hat{s}(\cdot)$  is given by Equation (A.10) and  $\tilde{I}(t)$  is solved from:

$$\begin{aligned} Y(\tilde{I}, \bar{c}, t, \delta) &= \int_0^{2\tilde{I}} \left( \int_{4\tilde{I}-\varepsilon_2}^1 \bar{c}g_{12}(\varepsilon_1, \varepsilon_2)d\varepsilon_1 + \int_{2\tilde{I}}^{4\tilde{I}-\varepsilon_2} (t + \delta)g_{12}(\varepsilon_1, \varepsilon_2)d\varepsilon_1 \right) d\varepsilon_2 \\ &\quad + \int_{2\tilde{I}}^1 \left( \int_{2\tilde{I}}^1 \bar{c}g_{12}(\varepsilon_1, \varepsilon_2)d\varepsilon_1 + \int_{4\tilde{I}-\varepsilon_2}^{2\tilde{I}} t g_{12}(\varepsilon_1, \varepsilon_2)d\varepsilon_1 \right) d\varepsilon_2 - c = 0. \end{aligned} \quad (\text{A.14})$$

Next, we check the second-order condition to verify that  $\pi_i(s_i, I_i | s_j, I_j)$  is jointly concave in  $s_i$  and  $I_i$  when  $s_1 = s_2 = \tilde{s}(t)$  and  $I_1 = I_2 = \tilde{I}(t)$ . For expositional brevity, in the following proof, we use  $\pi_i(s_i, I_i)$  to represent  $\pi_i(s_i, I_i | s_j, I_j)$ , and we use  $\tilde{I}$  and  $\tilde{s}$  to represent  $\tilde{I}(t)$  and  $\tilde{s}(t)$ , respectively. The Hessian matrix of  $\pi_i(s_i, I_i)$  is given by

$$H = \begin{bmatrix} \frac{\partial^2 \pi_i(s_i, I_i)}{\partial I_i^2} & \frac{\partial^2 \pi_i(s_i, I_i)}{\partial I_i \partial s_i} \\ \frac{\partial^2 \pi_i(s_i, I_i)}{\partial I_i \partial s_i} & \frac{\partial^2 \pi_i(s_i, I_i)}{\partial s_i^2} \end{bmatrix},$$

in which:

$$\begin{aligned}
\frac{\partial^2 \pi_i(s_i, I_i)}{\partial I_i^2} &= -\frac{1}{d_i} \left[ \int_0^{\frac{I_j}{d_j}} \left( (t + \delta)g_{12}\left(\frac{I_i}{d_i}, \varepsilon_j\right) + (\bar{c} - t - \delta)g_{12}\left(\frac{I_1 + I_2 - \varepsilon_j d_j}{d_i}, \varepsilon_j\right) \right) \varepsilon_j \right] \\
&\quad - \frac{1}{d_i} \left[ \int_{\frac{I_j}{d_j}}^1 \left( (\bar{c} - t)g_{12}\left(\frac{I_i}{d_i}, \varepsilon_j\right) + t g_{12}\left(\frac{I_1 + I_2 - \varepsilon_j d_j}{d_i}, \varepsilon_j\right) \right) \varepsilon_j \right], \\
\frac{\partial^2 \pi_i(s_i, I_i)}{\partial s_i^2} &= -2k + \beta^2 \frac{I_j^2}{d_j^3} \left[ \int_0^{\frac{I_i}{d_i}} t g_{12}(\varepsilon_i, \frac{I_j}{d_j}) d\varepsilon_i + \int_{\frac{I_i}{d_i}}^1 (\bar{c} - t - \delta) g_{12}(\varepsilon_i, \frac{I_j}{d_j}) d\varepsilon_i \right] \\
&\quad - \beta^2 \frac{I_i^2}{d_i^3} \left[ \int_0^{\frac{I_j}{d_j}} (t + \delta) g_{12}\left(\frac{I_i}{d_i}, \varepsilon_j\right) d\varepsilon_j + \int_{\frac{I_j}{d_j}}^1 (\bar{c} - t) g_{12}\left(\frac{I_i}{d_i}, \varepsilon_j\right) d\varepsilon_j \right] \\
&\quad - \frac{\beta^2}{d_i^3} \left[ \int_0^{\frac{I_j}{d_j}} (\bar{c} - t - \delta) (I_1 + I_2 - \varepsilon_j)^2 g_{12}\left(\frac{I_1 + I_2 - \varepsilon_j d_j}{d_i}, \varepsilon_j\right) d\varepsilon_j + \int_{\frac{I_j}{d_j}}^1 t (I_1 + I_2 - \varepsilon_j)^2 g_{12}\left(\frac{I_1 + I_2 - \varepsilon_j d_j}{d_i}, \varepsilon_j\right) d\varepsilon_j \right], \\
\frac{\partial^2 \pi_i(s_i, I_i)}{\partial I_i \partial s_i} &= \frac{\beta}{d_i^2} \left[ \int_0^{\frac{I_j}{d_j}} \left( I_i (t + \delta) g_{12}\left(\frac{I_i}{d_i}, \varepsilon_j\right) + (\bar{c} - t - \delta) (I_1 + I_2 - \varepsilon_j) g_{12}\left(\frac{I_1 + I_2 - \varepsilon_j d_j}{d_i}, \varepsilon_j\right) \right) d\varepsilon_j \right] \\
&\quad + \frac{\beta}{d_i^2} \left[ \int_{\frac{I_j}{d_j}}^1 \left( I_i (\bar{c} - t) g_{12}\left(\frac{I_i}{d_i}, \varepsilon_j\right) + t (I_1 + I_2 - \varepsilon_j) g_{12}\left(\frac{I_1 + I_2 - \varepsilon_j d_j}{d_i}, \varepsilon_j\right) \right) d\varepsilon_j \right].
\end{aligned}$$

Note that  $d_i = 1/2 + \beta(s_i - s_j)$  for  $i, j = 1, 2$  and  $i \neq j$ . We want to verify that the Hessian matrix  $H$  is negative definite at the point  $I_1 = I_2 = \tilde{I}$  and  $s_1 = s_2 = \tilde{s}$ . Given that  $t \leq \bar{c} - \delta$ , it is obvious  $\frac{\partial^2 \pi_i(s_i, I_i)}{\partial I_i^2} < 0$  at any points. Thus, we just need to verify that  $\det(H) > 0$  when  $I_1 = I_2 = \tilde{I}$  and  $s_1 = s_2 = \tilde{s}$ , i.e.,

$$\left[ \frac{\partial^2 \pi_i(s_i, I_i)}{\partial I_i^2} \frac{\partial^2 \pi_i(s_i, I_i)}{\partial s_i^2} - \left( \frac{\partial^2 \pi_i(s_i, I_i)}{\partial I_i \partial s_i} \right)^2 \right] \Big|_{I_1=I_2=\tilde{I}, s_1=s_2=\tilde{s}} > 0.$$

Let  $V_0 = \int_0^{2I} g_{12}(2I, \varepsilon) d\varepsilon$ ,  $V_1 = \int_{2I}^1 g_{12}(2I, \varepsilon) d\varepsilon$ ,  $C_0 = \int_0^{2I} (2I - \varepsilon) g_{12}(4I - \varepsilon, \varepsilon) d\varepsilon$ ,  $C_1 = \int_{2I}^1 (2I - \varepsilon) g_{12}(4I - \varepsilon, \varepsilon) d\varepsilon$ ,  $D_0 = \int_0^{2I} (2I - \varepsilon)^2 g_{12}(4I - \varepsilon, \varepsilon) d\varepsilon$ ,  $D_1 = \int_{2I}^1 (2I - \varepsilon)^2 g_{12}(4I - \varepsilon, \varepsilon) d\varepsilon$ ,  $E_0 = \int_0^{2I} g_{12}(4I - \varepsilon, \varepsilon) d\varepsilon$ ,  $E_1 = \int_{2I}^1 g_{12}(4I - \varepsilon, \varepsilon) d\varepsilon$ . We can write  $\det(H)$  as follows:

$$\begin{aligned}
&\left[ \frac{\partial^2 \pi_i(s_i, I_i)}{\partial I_i^2} \frac{\partial^2 \pi_i(s_i, I_i)}{\partial s_i^2} - \left( \frac{\partial^2 \pi_i(s_i, I_i)}{\partial I_i \partial s_i} \right)^2 \right] \Big|_{I_1=I_2=\tilde{I}, s_1=s_2=\tilde{s}} \\
&= \left\{ [-2((t + \delta)V_0 + (\bar{c} - t - \delta)E_0 + (\bar{c} - t)V_1 + tE_1)] \times [-2k - 8\beta^2 \tilde{I}^2 \delta(V_0 + V_1) - 8\beta^2 ((\bar{c} - t - \delta)D_0 + tD_1)] \right. \\
&\quad \left. - [4\beta \tilde{I}((t + \delta)V_0 + (\bar{c} - t)V_1) + 4\beta((\bar{c} - t - \delta)C_0 + tC_1)]^2 \right\} \Big|_{I=\tilde{I}}.
\end{aligned}$$

Given Lemma A.1, we have  $C_1 = -C_0$ ,  $D_0 = D_1$ , and  $E_0 = E_1$ . Thus, we can simplify  $\det(H)$  as below:

$$\begin{aligned}
&\left[ \frac{\partial^2 \pi_i(s_i, I_i)}{\partial I_i^2} \frac{\partial^2 \pi_i(s_i, I_i)}{\partial s_i^2} - \left( \frac{\partial^2 \pi_i(s_i, I_i)}{\partial I_i \partial s_i} \right)^2 \right] \Big|_{I_1=I_2=\tilde{I}, s_1=s_2=\tilde{s}} \\
&= \left\{ [2((t + \delta)V_0 + (\bar{c} - t)V_1 + (\bar{c} - \delta)E_0)] \times [2k + 8\beta^2 \tilde{I}^2 \delta(V_0 + V_1) + 8\beta^2 (\bar{c} - \delta)D_0] \right. \\
&\quad \left. - 16\beta^2 [\tilde{I}((t + \delta)V_0 + (\bar{c} - t)V_1) + (\bar{c} - 2t - \delta)C_0]^2 \right\} \Big|_{I=\tilde{I}}. \tag{A.15}
\end{aligned}$$

After simple transformation of Equation (A.15), it is clear that  $\det(H)|_{I_1=I_2=\tilde{I}, s_1=s_2=\tilde{s}} > 0$  is equivalent to:

$$\frac{k}{4\beta^2} > \left\{ \frac{[\tilde{I}((t + \delta)V_0 + (\bar{c} - t)V_1) + (\bar{c} - 2t - \delta)C_0]^2}{(t + \delta)V_0 + (\bar{c} - t)V_1 + (\bar{c} - \delta)E_0} - (\tilde{I}^2 \delta(V_0 + V_1) + (\bar{c} - \delta)D_0) \right\} \Big|_{I=\tilde{I}}.$$

In the endogenous-inventory case, we assume that  $\beta < \bar{\beta} = \min\{\hat{\beta}_1(\tilde{I}^N), \hat{\beta}_2(\tilde{I})\}$  (see the definition in the beginning of Part E), which can guarantee that

$$\frac{k}{4\beta^2} > \left\{ \frac{\left[ \tilde{I}((t+\delta)V_0 + (\bar{c}-t)V_1) + (\bar{c}-2t-\delta)C_0 \right]^2}{(t+\delta)V_0 + (\bar{c}-t)V_1 + (\bar{c}-\delta)E_0} \right\} \Big|_{I=\tilde{I}}.$$

Thus, given  $0 \leq \delta \leq \bar{c}$ , it is clear that  $\det(H)|_{I_1=I_2=\tilde{I}, s_1=s_2=\tilde{s}} > 0$  holds. Therefore, we have shown that  $\pi_i(s_i, I_i)$  is jointly concave in  $s_i$  and  $I_i$  when  $s_1 = s_2 = \tilde{s}$  and  $I_1 = I_2 = \tilde{I}$ .

(b) According to the proof of part (a),  $\tilde{I}(t)$  is solved from  $Y(I, \bar{c}, t, \delta) = 0$ , where  $Y(\cdot)$  is given by Equation (A.14). Taking derivative of  $Y(I, \bar{c}, t, \delta)$  with respect to  $I, \bar{c}, t$ , and  $\delta$ , we have:

$$\begin{aligned} \frac{\partial Y(I, \bar{c}, t, \delta)}{\partial I} &= - \int_{2I}^1 (2(\bar{c}-t)g_{12}(2I, \varepsilon_2) + 4tg_{12}(4I - \varepsilon_2, \varepsilon_2))d\varepsilon_2 \\ &\quad - \int_0^{2I} (2(t+\delta)g_{12}(2I, \varepsilon_2) + 4(\bar{c}-t-\delta)g_{12}(4I - \varepsilon_2, \varepsilon_2))d\varepsilon_2 \leq 0, \\ \frac{\partial Y(I, \bar{c}, t, \delta)}{\partial \bar{c}} &= \int_0^{2I} \left( \int_{4I-\varepsilon_1}^1 g_{12}(\varepsilon_1, \varepsilon_2)d\varepsilon_1 \right) d\varepsilon_2 + \int_{2I}^1 \left( \int_{2I}^1 g_{12}(\varepsilon_1, \varepsilon_2)d\varepsilon_1 \right) d\varepsilon_2 \geq 0, \\ \frac{\partial Y(I, \bar{c}, t, \delta)}{\partial t} &= \int_0^{2I} \left( \int_{2I}^{4I-\varepsilon_2} g_{12}(\varepsilon_1, \varepsilon_2)d\varepsilon_1 \right) d\varepsilon_2 + \int_{2I}^1 \left( \int_{4I-\varepsilon_2}^{2I} g_{12}(\varepsilon_1, \varepsilon_2)d\varepsilon_1 \right) d\varepsilon_2 \geq 0, \text{ and} \\ \frac{\partial Y(I, \bar{c}, t, \delta)}{\partial \delta} &= \int_0^{2I} \left( \int_{2I}^{4I-\varepsilon_2} g_{12}(\varepsilon_1, \varepsilon_2)d\varepsilon_1 \right) d\varepsilon_2 \geq 0, \end{aligned}$$

Obviously,  $\tilde{I}(t)$  is independent in  $\beta$ . According to Chain Rule, we have:

$$\begin{aligned} \frac{\partial \tilde{I}(t)}{\partial \bar{c}} &= - \frac{\partial Y(I, \bar{c}, t, \delta)}{\partial \bar{c}} / \frac{\partial Y(I, \bar{c}, t, \delta)}{\partial I} \Big|_{I=\tilde{I}(t)} \geq 0, \quad \frac{\partial \tilde{I}(t)}{\partial t} = - \frac{\partial Y(I, \bar{c}, t, \delta)}{\partial t} / \frac{\partial Y(I, \bar{c}, t, \delta)}{\partial I} \Big|_{I=\tilde{I}(t)} \geq 0, \text{ and} \\ \frac{\partial \tilde{I}(t)}{\partial \delta} &= - \frac{\partial Y(I, \bar{c}, t, \delta)}{\partial \delta} / \frac{\partial Y(I, \bar{c}, t, \delta)}{\partial I} \Big|_{I=\tilde{I}(t)} \geq 0. \end{aligned}$$

Therefore,  $\tilde{I}(t)$  is increasing in  $\bar{c}, t$ , and  $\delta$ .

(c) Taking derivative of  $\tilde{s}(t)$  with respect to  $\bar{c}, t, \delta$ , and  $\beta$ :

$$\begin{aligned} \frac{\partial \tilde{s}(t)}{\partial \bar{c}} &= \frac{\partial \tilde{s}(t, \tilde{I}(t))}{\partial \bar{c}} = \left( \frac{\partial \tilde{s}(t, I)}{\partial \bar{c}} + \frac{\partial \tilde{s}(t, I)}{\partial I} \frac{\partial \tilde{I}(t)}{\partial \bar{c}} \right) \Big|_{I=\tilde{I}(t)}, \quad \frac{\partial \tilde{s}(t)}{\partial t} = \frac{\partial \tilde{s}(t, \tilde{I}(t))}{\partial t} = \left( \frac{\partial \tilde{s}(t, I)}{\partial t} + \frac{\partial \tilde{s}(t, I)}{\partial I} \frac{\partial \tilde{I}(t)}{\partial t} \right) \Big|_{I=\tilde{I}(t)}, \\ \frac{\partial \tilde{s}(t)}{\partial \delta} &= \frac{\partial \tilde{s}(t, \tilde{I}(t))}{\partial \delta} = \left( \frac{\partial \tilde{s}(t, I)}{\partial \delta} + \frac{\partial \tilde{s}(t, I)}{\partial I} \frac{\partial \tilde{I}(t)}{\partial \delta} \right) \Big|_{I=\tilde{I}(t)}, \quad \text{and} \quad \frac{\partial \tilde{s}(t)}{\partial \beta} = \frac{\partial \tilde{s}(t, \tilde{I}(t))}{\partial \beta} > 0. \end{aligned}$$

Since  $\frac{\partial \tilde{s}(t, I)}{\partial \bar{c}} < 0$ ,  $\frac{\partial \tilde{s}(t, I)}{\partial t} < 0$ ,  $\frac{\partial \tilde{s}(t, I)}{\partial \delta} < 0$ ,  $\frac{\partial \tilde{I}(t)}{\partial \bar{c}} \geq 0$ ,  $\frac{\partial \tilde{I}(t)}{\partial t} \geq 0$ ,  $\frac{\partial \tilde{I}(t)}{\partial \delta} \geq 0$ , and  $\frac{\partial \tilde{s}(t, I)}{\partial I}$  could be positive and negative, one can verify that  $\frac{\partial \tilde{s}(t)}{\partial \bar{c}}$ ,  $\frac{\partial \tilde{s}(t)}{\partial t}$ , and  $\frac{\partial \tilde{s}(t)}{\partial \delta}$  could be positive or negative. Therefore,  $\tilde{s}(t)$  is non-monotone in  $\bar{c}, t$ , and  $\delta$ , and  $\tilde{s}(t)$  increases in  $\beta$ .

(d) Retailer  $i$ 's equilibrium profit is  $\tilde{\pi}_i(t) = \hat{\pi}_i(t, \tilde{I}(t))$ , where  $\hat{\pi}_i(\cdot)$  is given in Equation (A.11). Taking derivative of  $\tilde{\pi}_i(t)$  with respect to  $\bar{c}, t, \delta$ , and  $\beta$ :  $\frac{\partial \tilde{\pi}_i(t)}{\partial \bar{c}} = \frac{\partial \hat{\pi}_i(t, \tilde{I}(t))}{\partial \bar{c}} = \left( \frac{\partial \hat{\pi}_i(t, I)}{\partial \bar{c}} + \frac{\partial \hat{\pi}_i(t, I)}{\partial I} \frac{\partial \tilde{I}(t)}{\partial \bar{c}} \right) \Big|_{I=\tilde{I}(t)}$ ,  $\frac{\partial \tilde{\pi}_i(t)}{\partial t} = \frac{\partial \hat{\pi}_i(t, \tilde{I}(t))}{\partial t} = \left( \frac{\partial \hat{\pi}_i(t, I)}{\partial t} + \frac{\partial \hat{\pi}_i(t, I)}{\partial I} \frac{\partial \tilde{I}(t)}{\partial t} \right) \Big|_{I=\tilde{I}(t)}$ ,  $\frac{\partial \tilde{\pi}_i(t)}{\partial \delta} = \frac{\partial \hat{\pi}_i(t, \tilde{I}(t))}{\partial \delta} = \left( \frac{\partial \hat{\pi}_i(t, I)}{\partial \delta} + \frac{\partial \hat{\pi}_i(t, I)}{\partial I} \frac{\partial \tilde{I}(t)}{\partial \delta} \right) \Big|_{I=\tilde{I}(t)}$ , and  $\frac{\partial \tilde{\pi}_i(t)}{\partial \beta} = -2k\tilde{s}(t) \frac{\partial \tilde{s}(t)}{\partial \beta} < 0$ .

Note that  $\hat{\pi}_i(t, I)$  increases in  $t$ , is non-monotone in  $I, \bar{c}$ , and  $\delta$ ; and  $\tilde{I}(t)$  is increasing in  $\bar{c}, t$ , and  $\delta$ . Thus, one can easily verify that  $\frac{\partial \tilde{\pi}_i(t)}{\partial \bar{c}}$ ,  $\frac{\partial \tilde{\pi}_i(t)}{\partial t}$ , and  $\frac{\partial \tilde{\pi}_i(t)}{\partial \delta}$  could be positive or negative. Therefore,  $\tilde{\pi}_i(t)$  is non-monotone in  $\bar{c}, t$ , and  $\delta$ , and it decreases in  $\beta$ .  $\square$

**Proof of Proposition 3.** According to Lemmas 4 and 5,  $\tilde{I}^N$  is solved from  $Y^N(I, \bar{c}) = \bar{c}(1 - G(2I)) - c$ , and  $\tilde{I}(t)$  is solved from  $Y(I, \bar{c}, t, \delta) = 0$  (see Equation (A.14)).

When  $t = 0$ , one can verify that  $Y(I, \bar{c}, 0, \delta) - Y^N(I, \bar{c}) = \int_0^{2I} \left( \int_{2I}^{4I-\varepsilon_2} (t + \delta - \bar{c})g_{12}(\varepsilon_1, \varepsilon_2)d\varepsilon_1 \right) d\varepsilon_2 \leq 0$ . Moreover, since  $\frac{\partial Y(I, \bar{c}, t, \delta)}{\partial I} \leq 0$  and  $\frac{\partial Y^N(I, \bar{c})}{\partial I} \leq 0$ , we have  $\tilde{I}(0) \leq \tilde{I}^N$ .

When  $t = \bar{c} - \delta$ , one can verify that  $Y(I, \bar{c}, \bar{c} - \delta, \delta) - Y^N(I, \bar{c}) = \int_{2I}^1 \left( \int_{4I-\varepsilon_2}^{2I} (r - \delta)g_{12}(\varepsilon_1, \varepsilon_2)d\varepsilon_1 \right) d\varepsilon_2 \geq 0$ . Moreover, since  $\frac{\partial Y(I, \bar{c}, t, \delta)}{\partial I} \leq 0$  and  $\frac{\partial Y^N(I, \bar{c})}{\partial I} \leq 0$ , we have  $\tilde{I}(\bar{c} - \delta) \geq \tilde{I}^N$ .

In addition, according to Lemma 5,  $\tilde{I}(t)$  is increasing  $t$ ; and obviously,  $\tilde{I}^N$  is independent in  $t$ . Therefore, there exists  $\tilde{t}_I \in [0, \bar{c} - \delta]$  such that  $\tilde{I}(t) \geq \tilde{I}^N$  when  $t \geq \tilde{t}_I$  and  $\tilde{I}(t) < \tilde{I}^N$  otherwise.  $\square$

**Proof of Proposition 4.** Given that  $g(\varepsilon) = 1$  for  $\varepsilon \in [0, 1]$  and  $g_{12}(\varepsilon_1, \varepsilon_2) = 1$  for  $\varepsilon_1, \varepsilon_2 \in [0, 1]$ , we can simplify  $\tilde{I}^N$ ,  $\tilde{s}^N$ ,  $\tilde{\pi}_i^N$ ,  $\tilde{I}(t)$ ,  $\tilde{s}(t)$ , and  $\tilde{\pi}_i(t)$  (see the proof of Lemmas 4-5) as below:

$$\tilde{I}^N = \frac{1}{2}(1 - \frac{c}{\bar{c}}) \quad (\text{A.16a})$$

$$\tilde{s}^N = \hat{s}^N(\tilde{I}^N) = \beta \frac{p - \bar{c}(1 - 4(\tilde{I}^N)^2)}{4k} = \beta \cdot \frac{p - 2c + c^2/\bar{c}}{4k} \quad (\text{A.16b})$$

$$\tilde{\pi}_i^N = \hat{\pi}_i^N(\tilde{I}^N) = p \cdot \int_0^1 \frac{1}{2} \varepsilon_i g(\varepsilon_i) d\varepsilon_i - \bar{c} \int_{2\tilde{I}^N}^1 (\frac{1}{2} \varepsilon_i - \tilde{I}^N) g(\varepsilon_i) d\varepsilon_i - c\tilde{I}^N - k(\tilde{s}^N)^2 \quad (\text{A.16c})$$

$$= p \cdot \frac{1}{4} - \bar{c} \cdot \frac{(1 - 2\tilde{I}^N)^2}{4} - c\tilde{I}^N - k(\tilde{s}^N)^2 = \frac{((p - 2c)\bar{c} + c^2)(4k\bar{c} - ((p - 2c)\bar{c} + c^2)\beta^2)}{16k\bar{c}^2} \quad (\text{A.16d})$$

$$\tilde{I}(t) = \begin{cases} \frac{t - \bar{c} + \sqrt{3\bar{c}^2 + 2\bar{c}t + t^2 - 2c(\bar{c} + 2t - \delta) - 2\bar{c}\delta}}{2(\bar{c} + 2t - \delta)}, & \text{if } t < \frac{8c - 3\bar{c} - \delta}{2} \\ \frac{3\bar{c} - t - 2\delta - \sqrt{c(6\bar{c} - 4t - 6\delta) + (t + \delta)^2}}{6\bar{c} - 4t - 6\delta}, & \text{if } t \geq \frac{8c - 3\bar{c} - \delta}{2} \end{cases} \quad (\text{A.16e})$$

$$\tilde{s}(t) = \hat{s}(t, \tilde{I}(t)) = \begin{cases} \beta \cdot \frac{4\tilde{I}^2(2\bar{c} - \delta - 2t) + p - \bar{c}}{4k}, & \text{if } t < \frac{8c - 3\bar{c} - \delta}{2} \\ \beta \cdot \frac{p + (2\tilde{I} - 1)(2\tilde{I}(3\delta + 6t - 2\bar{c}) + (2\bar{c} - \delta - 2t))}{4k}, & \text{if } t \geq \frac{8c - 3\bar{c} - \delta}{2} \end{cases} \quad (\text{A.16f})$$

$$\tilde{\pi}_i(t) = \hat{\pi}_i(t, \tilde{I}(t)) = p \cdot E[\frac{1}{2}\varepsilon_i] + t \cdot E[(\min\{\tilde{I} - \frac{1}{2}\varepsilon_i, \frac{1}{2}\varepsilon_j - \tilde{I}\})^+] - (t + \delta) \cdot E[(\min\{\frac{1}{2}\varepsilon_i - \tilde{I}, \tilde{I} - \frac{1}{2}\varepsilon_j\})^+] \quad (\text{A.16g})$$

$$- \bar{c} \cdot E[(\frac{1}{2}\varepsilon_i - \tilde{I} - (\tilde{I} - \frac{1}{2}\varepsilon_j))^+] - c\tilde{I} - k(\tilde{s}(t))^2 \quad (\text{A.16h})$$

$$= \begin{cases} p \cdot \frac{1}{4} - \bar{c}(\frac{1}{4} - \tilde{I} + \frac{8}{3}\tilde{I}^3) - \delta(\tilde{I}^2 - \frac{8}{3}\tilde{I}^3) - c\tilde{I} - k(\tilde{s}(t))^2, & \text{if } t < \frac{8c - 3\bar{c} - \delta}{2} \\ p \cdot \frac{1}{4} - \frac{(1 - 2\tilde{I})^2}{12}(\bar{c}(4 - 8\tilde{I}) + \delta(8\tilde{I} - 1)) - c\tilde{I} - k(\tilde{s}(t))^2, & \text{if } t \geq \frac{8c - 3\bar{c} - \delta}{2} \end{cases} \quad (\text{A.16i})$$

$$= \begin{cases} p \cdot \frac{1}{4} - \bar{c}(\frac{1}{4} - \tilde{I} + \frac{8}{3}\tilde{I}^3) - \delta(\tilde{I}^2 - \frac{8}{3}\tilde{I}^3) - c\tilde{I} - \beta^2 \cdot \frac{(4\tilde{I}^2(2\bar{c} - \delta - 2t) + p - \bar{c})^2}{16k}, & \text{if } t < \frac{8c - 3\bar{c} - \delta}{2} \\ p \cdot \frac{1}{4} - \frac{(1 - 2\tilde{I})^2}{12}(\bar{c}(4 - 8\tilde{I}) + \delta(8\tilde{I} - 1)) - c\tilde{I} - \beta^2 \cdot \frac{(p + (2\tilde{I} - 1)(2\tilde{I}(3\delta + 6t - 2\bar{c}) + (2\bar{c} - \delta - 2t)))^2}{16k}, & \text{if } t \geq \frac{8c - 3\bar{c} - \delta}{2} \end{cases} \quad (\text{A.16j})$$

(a) It is easy to verify that  $\tilde{s}(t)$  is continuous in  $t$ . In addition, though tedious but straightforward algebraic analysis, we can show: If  $c \leq \frac{11\bar{c}^3 - 11\bar{c}^2\delta + \bar{c}\delta^2 + \delta^3}{2(3\bar{c} - 2\delta)^2}$ ,  $\tilde{s}(t)$  decreases in  $t$ , i.e.,  $\frac{\partial \tilde{s}(t)}{\partial t} \leq 0$  for any  $t \in [0, \bar{c} - \delta]$ ; otherwise,  $\tilde{s}(t)$  first increases then decreases in  $t$ , i.e.,  $\frac{\partial \tilde{s}(t)}{\partial t} > 0$  when  $t < t_1$  and  $\frac{\partial \tilde{s}(t)}{\partial t} < 0$  when  $t > t_1$ , where  $t_1$  is the second root of the polynomial equation  $2t^3 + (3\bar{c} - \delta)t^2 + (14\bar{c}\delta - 4\delta^2 - 12\bar{c}^2)t + 18\bar{c}^2c - 11\bar{c}^3 - 24\bar{c}c\delta + 11\bar{c}^2\delta + 8c\delta^2 - \bar{c}\delta^2 - \delta^3 = 0$ . Thus,  $\tilde{s}(t)$  either decreases in  $t$  or first increases then decreases in  $t$ .

Moreover, it is easy to verify that  $\tilde{s}(0) > \tilde{s}^N$  always hold, and that  $\tilde{s}(\bar{c} - \delta) > \tilde{s}^N$  when  $c > \bar{c}$  and  $\tilde{s}(\bar{c} - \delta) \leq \tilde{s}^N$  when  $c \leq \bar{c}$ , where  $\bar{c} = \frac{3\bar{c}^2 - 5\bar{c}\delta + 2\delta\sqrt{\bar{c}\delta}}{3(\bar{c} - \delta)}$ . Combining the result that  $\tilde{s}^N$  is independent in  $t$  and  $\tilde{s}(t)$  either decreases in  $t$  or first increases then decreases in  $t$ , we have: When  $c > \bar{c}$ ,  $\tilde{s}(t) > \tilde{s}^N$  for any  $t \in [0, \bar{c} - \delta]$ ; when  $c \leq \bar{c}$ , there exists a unique  $\tilde{t}_s \in [0, \bar{c} - \delta]$  such that  $\tilde{s}(t) > \tilde{s}^N$  when  $t < \tilde{t}_s$  and  $\tilde{s}(t) < \tilde{s}^N$  when  $t > \tilde{t}_s$ , where  $\tilde{t}_s$  is the unique solution of  $\tilde{s}(t) = \tilde{s}^N$ .

We further define that  $\tilde{t}_s > \bar{c} - \delta$  when  $c > \bar{c}$  and  $\tilde{t}_s$  as the unique solution of  $\tilde{s}(t) = \tilde{s}^N$  when  $c \leq \bar{c}$ . Thus, we can conclude that  $\tilde{s}(t) > \tilde{s}^N$  when  $t < \tilde{t}_s$  and  $\tilde{s}(t) < \tilde{s}^N$  when  $t > \tilde{t}_s$ .

(b)&(c) Similar to the proof of Proposition 1(b)&(c), we can show that:

$$\tilde{\Delta}(t) = \tilde{\pi}_i(t) - \tilde{\pi}_i^N = \hat{\pi}_i(t, \tilde{I}(t)) - \hat{\pi}_i^N(\tilde{I}^N) = \underbrace{\hat{R}(t, \tilde{I}(t)) - \hat{R}^N(\tilde{I}^N)}_{\text{First Term}} - \underbrace{k((\hat{s}(t, \tilde{I}(t)))^2 - (\hat{s}^N(\tilde{I}^N))^2)}_{\text{Second Term}}$$

where  $\hat{R}^N(I) = p \cdot \mu / 2 - \bar{c} \int_{2I}^1 (\varepsilon_i / 2 - I) g(\varepsilon_i) d\varepsilon_i$  and  $\hat{R}(t, I) = p \cdot \mu / 2 - \delta \int_0^{2I} (\int_{2I}^{4I - \varepsilon_2} (\varepsilon_1 / 2 - I) g_{12}(\varepsilon_1, \varepsilon_2) d\varepsilon_1) d\varepsilon_2 - \int_0^{2I} (\int_{4I - \varepsilon_2}^1 (\delta(I - \varepsilon_2 / 2) + \bar{c}(\varepsilon_1 / 2 + \varepsilon_2 / 2 - 2I)) g_{12}(\varepsilon_1, \varepsilon_2) d\varepsilon_1) d\varepsilon_2 - \bar{c} \int_{2I}^1 (\int_{2I}^1 (\varepsilon_1 / 2 - I) g_{12}(\varepsilon_1, \varepsilon_2) d\varepsilon_1) d\varepsilon_2$ . Moreover,  $(\hat{s}(t, \tilde{I}(t)))^2 - (\hat{s}^N(\tilde{I}^N))^2 = \beta^2((\hat{S}(t, \tilde{I}(t)))^2 - (\hat{S}^N(\tilde{I}^N))^2)$ , where  $\hat{S}(t, I) = \frac{(p\mu - A - B)}{2k}$  and  $\hat{S}^N(I) = \frac{(p\mu - \bar{c} \int_{2I}^1 \varepsilon g(\varepsilon) d\varepsilon)}{2k}$ .

Comparing with the proof of Lemma 1, we can find that  $\tilde{I}(t) = I^{nc}$ ,  $\tilde{I}^N = I^{nc-N}$ ,  $\hat{R}(t, \tilde{I}(t)) = \pi_i^{nc*}(t)$ , and  $\hat{R}^N(\tilde{I}^N) = \pi_i^{nc-N*}$ . As shown in Lemma 1, we can know that the firm term in  $\tilde{\Delta}(t)$  is positive, i.e.,  $\hat{R}(t, \tilde{I}(t)) - \hat{R}^N(\tilde{I}^N) = \pi_i^{nc*}(t) - \pi_i^{nc-N*} > 0$ . And it is easy to verify that the first term is independent in  $\beta$ .

Similar to the logic in the proof of Proposition 1(b)&(c), we can show that the second term in  $\tilde{\Delta}(t)$  is negative and decreases in  $\beta$  when  $t < \tilde{t}_s$ , and it is positive and increases in  $\beta$  when  $t > \tilde{t}_s$ . Hence,  $\tilde{\Delta}(t)$  decreases in  $\beta$  when  $t < \tilde{t}_s$ ; and  $\tilde{\Delta}(t) > 0$  and increases in  $\beta$  when  $t > \tilde{t}_s$ . Moreover, when  $t < \tilde{t}_s$ , there exists  $\tilde{\beta}(t) = \sqrt{\frac{\hat{R}(t, \tilde{I}(t)) - \hat{R}^N(\tilde{I}^N)}{k((\tilde{S}(t, \tilde{I}(t)))^2 - (\tilde{S}^N(\tilde{I}^N))^2)}}$  such that,  $\tilde{\Delta}(t) < 0$  iff  $\beta > \tilde{\beta}(t)$ , and  $\tilde{\Delta}(t) > 0$  iff  $\beta < \tilde{\beta}(t)$ .  $\square$

**Proof of Proposition 5.** (a) From Equation (A.16), it is easy to verify that  $\tilde{\pi}_i(t)$  is continuous in  $t$  for  $t \in [0, \bar{c} - \delta]$ . Moreover,  $\frac{d\tilde{\pi}_i(t)}{dt} = \frac{d\hat{R}(t, \tilde{I}(t))}{dt} - 2k\tilde{s}(t)\frac{d\tilde{s}(t)}{dt} = \frac{d\hat{R}(t, \tilde{I}(t))}{dI}\bigg|_{I=\tilde{I}(t)}\frac{d\tilde{I}(t)}{dt} - 2k\tilde{s}(t)\frac{d\tilde{s}(t)}{dt}$ . Note that  $\hat{R}(t, \tilde{I}(t))$  is concave in  $I$ ,  $\frac{d\tilde{I}(t)}{dt} > 0$ , and  $\tilde{s}(t)$  either decrease in  $t$  or first increases then decreases in  $t$ . Thus  $\tilde{\pi}_i(t)$  might be concave or convex in  $t$ . Thus, there always exists (maybe not unique) an optimal transfer price  $\tilde{t}^* \in [0, \bar{c} - \delta]$  that maximizes each retailer's profit, and  $\tilde{t}^*$  could be strictly smaller than  $\bar{c} - \delta$  (see the illustrated example in Figure 9).

(b) From the proof of Proposition 4, we have shown that  $\tilde{\Delta}(t) < 0$  iff  $\beta > \tilde{\beta}(t)$  and  $t < \tilde{t}_s$ , where  $\tilde{\beta}(t) = \sqrt{\frac{\hat{R}(t, \tilde{I}(t)) - \hat{R}^N(\tilde{I}^N)}{k((\tilde{S}(t, \tilde{I}(t)))^2 - (\tilde{S}^N(\tilde{I}^N))^2)}}$ .

Note that when  $c > \bar{c}$ ,  $\tilde{t}_s > \bar{c} - \delta$  holds. That is, given  $c > \bar{c}$ ,  $\tilde{\Delta}(t) < 0$  iff  $\beta > \tilde{\beta}(t)$  for any  $t \in [0, \bar{c} - \delta]$ . We define  $\tilde{\beta} = \max_{t \in [0, \bar{c} - \delta]} \tilde{\beta}(t)$ . Then, given  $c > \bar{c}$  and  $\beta > \tilde{\beta}$ ,  $\tilde{\Delta}(t) < 0$  holds for any  $t \in [0, \bar{c} - \delta]$ . One example of parameters that satisfies this condition is provided in Figure 9.

(c) In the centralized system,  $s_1^c = s_2^c = 0$ . However,  $\tilde{s}(t) > 0$  for any  $t$  given that  $\beta > 0$ . Thus, one can easily verify that  $\tilde{\pi}_i(t) < \pi_i^{c*}$  holds for any  $t \in [0, \bar{c} - \delta]$ , i.e., coordination cannot be achieved.  $\square$

## F. Additional Results

In this part, we provide some additional results that are omitted from the main paper. First, we conduct numerical studies to examine the impact of shipping cost ( $\delta$ ) on the equilibrium transfer price and inventory in the endogenous-inventory case, which complements the numerical analysis of Section 5.4 in the main paper. We have tested many different parameter regions; here, we present the results in Figure A.1, using a representative example with  $k = 1, p = 1, c = 0.45, \bar{c} = 0.5$ , and  $\beta = 0.4$ . Through numerical results, we can observe that the optimal transfer price ( $\tilde{t}^*$ ) and the full equilibrium inventory ( $\tilde{I}(\tilde{t}^*)$ ) both decrease in  $\delta$ .

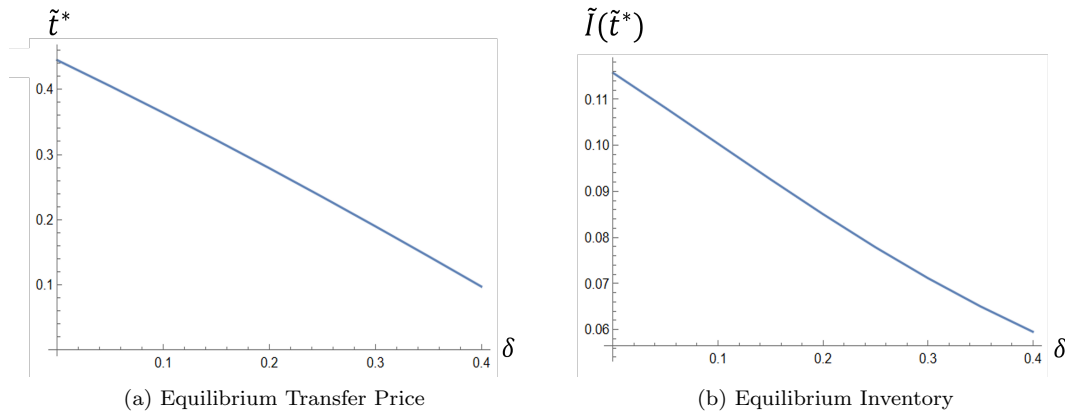

Figure A.1: Impact of  $\delta$  under Endogenous Inventory

Note: This figure is illustrated with  $g(x) = 1$  for  $x \in [0, 1]$  and  $g_{12}(x, y) = g(x)g(y)$ . Moreover,  $k = 1, p = 1, c = 0.45, \bar{c} = 0.5$ , and  $\beta = 0.4$ .

Second, we show the effect of demand uncertainty on the retailers' inventory-sharing decisions in the exogenous-inventory case. To simplify the analysis, we consider a special case of the random demand factors  $(\varepsilon_1, \varepsilon_2)$ . Suppose that  $\varepsilon_1$  and  $\varepsilon_2$  are independent and follow the same uniform distribution on the interval  $[\mu - \sigma, \mu + \sigma]$ , where  $\mu \in [0, 1]$  is the mean and  $\sigma \in [0, \min\{\mu, 1 - \mu\}]$  measures the level of demand uncertainty. Thus, the pdf of  $\varepsilon_i$  can be written as  $g(x) = 1/(2\sigma)$  for  $x \in [\mu - \sigma, \mu + \sigma]$ , and the pdf for the joint distribution of  $(\varepsilon_1, \varepsilon_2)$  is given by  $g_{12}(x, y) = g(x)g(y)$ . We define  $\hat{\Delta}(t, I) = \hat{\pi}_i(t, I) - \hat{\pi}_i^N(I)$  as the profit difference between the sharing and the no-sharing cases. When  $\hat{\Delta}(t, I) > 0$ , the two retailers would strictly prefer to agree on inventory sharing; when  $\hat{\Delta}(t, I) < 0$ , they would prefer not entering into an inventory-sharing agreement. As the level of demand uncertainty  $\sigma$  changes, the sign of  $\hat{\Delta}(t, I)$  can change, indicating that the retailers' preference for inventory-sharing will change. The following Proposition A.1 summarizes the effect of the level of demand uncertainty (i.e.,  $\sigma$ ) on the retailers' preferences for sharing.

**Proposition A.1.** *Suppose that  $\varepsilon_1$  and  $\varepsilon_2$  are independent and follow the same uniform distribution on  $[\mu - \sigma, \mu + \sigma]$ . Given the retailers' exogenous inventory levels  $I_1 = I_2 = I \in [0, 1]$ , when  $t \geq \frac{\bar{c} - \delta}{2}$ , then  $\hat{\Delta}(t, I) \geq 0$ ; when  $t < \frac{\bar{c} - \delta}{2}$ , then there exists  $\hat{\sigma}(t, I)$  such that:  $\hat{\Delta}(t, I) = 0$  if  $\sigma \leq |2I - \mu|$ ,  $\hat{\Delta}(t, I) < 0$  if  $|2I - \mu| < \sigma < \hat{\sigma}(t, I)$ , and  $\hat{\Delta}(t, I) > 0$  if  $\sigma > \hat{\sigma}(t, I)$ .*

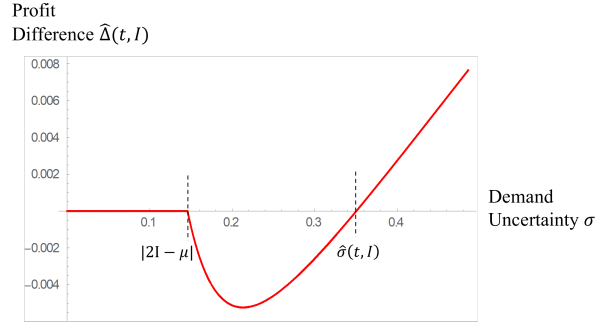

Figure A.2: Effect of Demand Uncertainty under Exogenous Inventory for  $t < \frac{\bar{c} - \delta}{2}$ .

Note: This figure is illustrated with  $g(x) = \frac{1}{2\delta}$  for  $x \in [\mu - \delta, \mu + \delta]$  and  $g(x) = 0$  otherwise;  $g_{12}(x, y) = g(x)g(y)$ .  $p = 1$ ,  $\beta = 0.5$ ,  $k = 5$ ,  $c = 0.1$ ,  $\bar{c} = 0.5$ ,  $t = 0.05$ ,  $\delta = 0.1$ ,  $I_1 = I_2 = 0.32$ , and  $\mu = 0.5$ .

Figure A.2 provides an illustrative example for Proposition A.1. From Proposition 1, we know that if the transfer price is high (i.e.,  $t \geq \frac{\bar{c} - \delta}{2}$ ), the retailers will always prefer having an inventory-sharing agreement, i.e.,  $\hat{\Delta}(t, I) \geq 0$  holds for all levels of demand uncertainty. So, our ensuing analysis will focus on the case of  $t < \frac{\bar{c} - \delta}{2}$ , where the sign of  $\hat{\Delta}(t, I)$  depends on the level of demand uncertainty  $\sigma$ . Specifically, when  $\sigma$  is low (i.e.,  $\sigma \leq |2I - \mu|$ ), no-sharing and sharing cases result in the same profits ( $\hat{\Delta}(t, I) = 0$ ) because this situation is equivalent to that of  $I \geq (\mu + \sigma)/2$  or  $I \leq (\mu - \sigma)/2$ , where the two retailers will either both overstock (i.e.,  $I \geq (\mu + \sigma)/2$ ) or both understock (i.e.,  $I \leq (\mu - \sigma)/2$ ) for all demand realizations such that inventory sharing never occurs even if a sharing agreement was accepted in Stage 1. When the level of demand uncertainty is moderate (i.e.,  $|2I - \mu| < \sigma < \hat{\sigma}(t, I)$ ), sharing inventory is less profitable than no-sharing because the benefit of risk pooling in this situation is dominated by the intensified service competition, which will make the retailers worse off. By contrast, under a high level of demand uncertainty (i.e.,  $\sigma > \hat{\sigma}(t, I)$ ), sharing inventory becomes more profitable because the retailers are more likely to face very high or very low demand, which makes the risk-pooling benefit of inventory sharing dominate the negative effect of intensified service competition (caused by inventory sharing at a low transfer price). This result shows that inventory sharing at low transfer prices can improve the retailers' profits only when they face a high level of demand uncertainty.

**Proof of Proposition A.1.** See the detailed proof on SSRN: [https://papers.ssrn.com/sol3/papers.cfm?abstract\\_id=3512712](https://papers.ssrn.com/sol3/papers.cfm?abstract_id=3512712). □
